# Supplementary material
Source: PubMed Central journal article supplement (PMC9814871)
Supplement: 42004_2021_476_MOESM1_ESM.pdf [file 42004_2021_476_MOESM1_ESM.pdf]

## Supplementary Information

### Mass spectrometric based detection of protein nucleotidylation in the RNA polymerase of SARS-CoV-2

Brian J. Conti<sup>1,2</sup>, Andrew S. Leicht <sup>1,3</sup>, Robert N. Kirchdoerfer<sup>1,3</sup> and Michael R. Sussman<sup>1,2,\*</sup>

<sup>1</sup> Department of Biochemistry, University of Wisconsin-Madison, Madison, WI 53706

<sup>2</sup> Center for Genomic Science Innovation, University of Wisconsin-Madison, Madison, WI 53706

<sup>3</sup> Institute for Molecular Virology, University of Wisconsin-Madison, Madison, WI 53706

\*To whom correspondence should be addressed: [msussman@wisc.edu](mailto:msussman@wisc.edu)

## Supplementary Methods

**Nidovirus sequence alignment and conservation.** To examine conservation of GMP-modification sites, the SARS-CoV-2 and EAV polyprotein 1ab Genbank sequences were compared those encoded by the same *Nidovirales* order representative species examined in Lehmann *et al.* <sup>1</sup>, in addition to SARS-CoV-2. These represented the *Arteriviridae*, *Coronaviridae*, *Mesoniviridae* and *Ronivirida* families in the *Nidovirales* order. The Porcine reproductive and respiratory syndrome virus (PVVR2) with accession JX138233 could not be found in Genbank, and therefore, five alternate strains of the virus were used instead. The full list of *Nidovirales* species is as follows ((Genbank accession number) (protein name) [species]):

- 1) YP\_001661452.1 ORF1ab replicase polyprotein pp1ab [*Gill-associated virus*]
- 2) YP\_009666324.1 replicase polyprotein 1ab [*Yellow head virus*]
- 3) AEH26445.1 replicase polyprotein 1ab [*Cavally virus*]
- 4) YP\_009026378.1 ORF 1ab [*Casuarina virus*]
- 5) BAN58307.2 pp1a polyprotein [*Dak Nong virus*]
- 6) YP\_007697629.1 ORF1ab [*Hana virus*]
- 7) YP\_007697642.1 ORF1ab [*Nse virus*]
- 8) YP\_007697636.1 ORF1ab [*Meno virus*]
- 9) YP\_008798230.1 polyprotein 1ab [*Porcine torovirus*]
- 10) YP\_009052475.1 pp1ab [*Ball python nidovirus 1*]
- 11) YP\_337905.2 polyprotein 1ab [*Breda virus*]
- 12) ABI97394.1 replicase polyprotein 1ab [*White bream virus*]
- 13) YP\_009505581.1 replicase polyprotein 1ab [*Fathead minnow nidovirus*]
- 14) AEU12347.3 replicase polyprotein 1ab [*Wobbly possum disease virus*]
- 15) YP\_009109556.3 viral nonstructural polyprotein [*Simian hemorrhagic fever virus*]
- 16) AZT89154.1 ORF1ab protein [*Simian hemorrhagic fever virus*]
- 17) AGA19089.1 ORF1a [*Simian hemorrhagic fever virus*]
- 18) AGA19090.1 ORF1b [*Simian hemorrhagic fever virus*]
- 19) AEC48046.1 polyprotein [*Kibale red colobus virus 1*]
- 20) AEC48047.1 polyprotein, partial [*Kibale red colobus virus 1*]
- 21) AEJ54657.1 replicase polyprotein 1a [*Porcine reproductive and respiratory syndrome virus*]
- 22) AEJ54658.1 replicase polyprotein 1b, partial [*Porcine reproductive and respiratory syndrome virus*]
- 23) QPK93580.1 |polyprotein 1ab [*Porcine reproductive and respiratory syndrome virus*]
- 24) APU51031.1 |polyprotein 1ab [*Porcine reproductive and respiratory syndrome virus*]
- 25) ANT45956.1 |polyprotein 1ab [*Porcine reproductive and respiratory syndrome virus*]
- 26) ALL55209.1 |polyprotein 1ab [*Porcine reproductive and respiratory syndrome virus*]
- 27) AFP43966.1 |polyprotein 1ab [*Porcine reproductive and respiratory syndrome virus*]
- 28) AAA74103.1 polyprotein [*Lactate dehydrogenase-elevating virus*]
- 29) AAA74104.1 polyprotein, partial [*Lactate dehydrogenase-elevating virus*]
- 30) AAA85663.1 polyprotein 1a [*Lactate dehydrogenase-elevating virus*]
- 31) AAA85664.1 polyprotein 1b, partial [*Lactate dehydrogenase-elevating virus*]
- 32) YP\_001008394.2 polyprotein 1ab [*Lactate dehydrogenase-elevating virus*]
- 33) ABI64071.1 replicase polyprotein, partial [*Equine arteritis virus*]
- 34) ABI64079.1 replicase polyprotein, partial [*Equine arteritis virus*]
- 35) AAP50483.1 putative ORF1ab polyprotein [*SARS coronavirus FRA*]
- 36) AFE48810.1 polyprotein [*Rabbit coronavirus HKU14*]
- 37) AAF19383.1 RNA-directed RNA polymerase [*Murine hepatitis virus strain 2*]
- 38) AAF19384.1 RNA-directed RNA polymerase [*Murine hepatitis virus strain 2*]

- 39) AAX76519.1 orf1ab polyprotein [*Human coronavirus HKU1*]
- 40) YP\_009513008.1 ORF1ab polyprotein [*Betacoronavirus Erinaceus/VMC/DEU/2012*]
- 41) ABG47051.1 ORF1 [*Bat coronavirus (BtCoV/133/2005)*]
- 42) ABN10874.1 orf1ab polyprotein [*Bat coronavirus HKU5-1*]
- 43) YP\_009047202.1 1AB polyprotein [*Middle East respiratory syndrome-related coronavirus*]
- 44) ADM33581.1 orf1ab polyprotein [*Bat coronavirus HKU9-10-2*]
- 45) YP\_008439200.1 replicase polyprotein 1ab [*Bat coronavirus CDPHE15/USA/2006*]
- 46) YP\_003766.2 replicase polyprotein 1ab [*Human coronavirus NL63*]
- 47) YP\_001718610.1 ORF1ab polyprotein [*Miniopterus bat coronavirus HKU8*]
- 48) YP\_001552234.1 orf1ab polyprotein [*Rhinolophus bat coronavirus HKU2*]
- 49) YP\_001718603.1 ORF1ab polyprotein [*Bat coronavirus 1A*]
- 50) AFI49429.1 replicase polyprotein 1ab [*Alpaca respiratory coronavirus*]
- 51) YP\_001351683.1 ORF1 [*Scotophilus bat coronavirus 512*]
- 52) AGK89913.1 polyprotein [*Porcine epidemic diarrhea virus*]
- 53) AFU92112.1 orf1ab polyprotein [*Rousettus bat coronavirus HKU10*]
- 54) YP\_009019180.1 orf1ab polyprotein [*Mink coronavirus strain WD1127*]
- 55) ACT10947.1 orf1ab polyprotein [*Feline coronavirus UU2*]
- 56) AGK85497.1 polyprotein 1ab [*Infectious bronchitis virus*]
- 57) AHB63480.1 replicase polyprotein [*Bottlenose dolphin coronavirus HKU22*]
- 58) YP\_005352845.1 replicase polyprotein [*Sparrow coronavirus HKU17*]
- 59) YP\_002308505.1 orf1ab polyprotein [*Munia coronavirus HKU13-3514*]
- 60) YP\_005352880.1 orf1ab gene product [*Common moorhen coronavirus HKU21*]
- 61) YP\_002308478.1 orf1ab polyprotein [*Bulbul coronavirus HKU11-934*]
- 62) YP\_009724389.1 ORF1ab polyprotein [*Severe acute respiratory syndrome coronavirus 2*]

These polyprotein 1ab or orf (open reading frame) 1ab proteins encode the large polypeptide that is cleaved by peptidases into the individual viral non-structural proteins (nsp) post-translationally (reviewed in Posthuma *et al.*)<sup>2</sup>, thus protein accession numbers for single nsp proteins in each species were not available. Some polyprotein Genbank entries were split into orf 1a and orf 1b, thus there are two separate entries for a single species.

Each sequence modified with GMP in this study (EAV nsp9, EAV nsp7, SARS-CoV-2 nsp7) was first aligned against each Nidoviral polyprotein sequences individually using the BLAST algorithm<sup>3,4</sup> in the stand alone BLAST+ software suite (version 2.11.00) available from the National Center of Biotechnology Information at <https://ftp.ncbi.nlm.nih.gov/blast/executables/blast+/LATEST/>. Genbank polyprotein sequences that did not contain homologous regions with the queried protein were apparent from the alignment results. These sequences were removed, and a multiple sequence alignment was performed on the remaining sequences using the Clustal Omega algorithm via the web interface found at <https://www.ebi.ac.uk/Tools/msa/clustalo/><sup>5</sup>.

The SARS-CoV-2 nsp7 sequence was only found in the *Coronaviridae* family, but was strongly conserved<sup>6</sup> as illustrated in Supplementary Figure 18. EAV nsp9 contains the RNA polymerase domain that is conserved throughout the *Nidovirales* order, thus the SARS-CoV-2 nsp12 sequence was included as an addition separate entry in the multiple sequence alignment for clarity<sup>2</sup>. This sequence alignment is found as Supplementary Figure 19. Because the GMP modified residue in EAV nsp9, K380, was completely conserved, a large number of sequences aligned. The SARS-CoV-2 residue K545, that is homologous to EAV nsp9 residue K380, was illustrated in the solved SARS-CoV-2 nsp12/nsp7/nsp8 structure (PDB 7btf) using Pymol software (Supplementary Figure 20)<sup>7</sup>. EAV nsp7 was only found in the *Arteriviridae* family, which has limited number of members. Within this family, the nsp7 $\alpha$  portion of the protein is conserved to a stronger extent than nsp7 $\beta$ , which contains the three GMP-modification sites<sup>8-10</sup> (Supplementary Figure 21).

**LC-MS/MS strategy for identification of GMP-modified peptide in mutant proteins.** Parallel WT GMP-labeled samples were always prepared with the mutant protein versions in the same experiment to ascertain GMP-modification of the original WT sites were observed. LC-MS/MS was acquired both in data-dependent and targeted acquisition modes. Peptide masses and m/z values (for charge states 1 -5) were calculated for unmodified and GMP-modified versions of at least one peptide containing a mutated modification site (See Supplementary Figure 11 and 15 for these peptides). These peptides were expected to have either similar charge states or one less charge compared to the corresponding WT peptide. The predicted m/z of unmodified and GMP-modified peptides were targeted, resulting in acquisition of HCD and ETHcD fragmented MS/MS spectra for these predicted m/z values every second of the LC elution gradient. Data was first searched with Proteome Discoverer for MS/MS matches. In all cases, the unmodified, mutant versions of the peptide were readily identified. If a GMP-modified version was not identified by MS/MS searches, the raw data was examined closely. First, we searched for an LC peak that had any of the predicted m/z values and

the correct charge by extracting ion chromatograms for those m/z values from the raw data using Freestyle software (Thermo). Second, we asked if any LC peaks with the predicted m/z value and charge yielded an HCD fragmented spectra containing the diagnostic guanine fragment ion using Freestyle. Only in the instance of the SARS-CoV-2 nsp7 mutant peptide 1-GSAMSDVKCTSVVL-14 were we able to identify the GMP-modified precursor after failing to obtain a MS/MS peptide spectrum match for the peptide. For the EAV nsp7 K156 GMP modification site, we originally discovered the modification on the tryptic peptide 144-GAQLEWDRHQEEKR-157. However, for unknown reasons, both the unmodified and GMP-modified versions of this peptide were absent in LC-MS/MS experiments examining the WT and mutant proteins. Therefore, we examined the K156 GMP-modification site in EAV nsp7 WT and EAV nsp7 K156A in the 150-DRHQEEKRNAGDDDDFAVSNDY-170 peptide that was a result of a chymotrypsin digest. The GMP-modification was readily observed in the WT peptide and assigned to K156. The GMP-modification was not observed in the mutant peptide 150-DRHQEEARNAGDDDDFAVSNDY-170 (Supplementary Figure 11).

## Supplementary References

- 1 Lehmann, K. C. *et al.* Discovery of an essential nucleotidylating activity associated with a newly delineated conserved domain in the RNA polymerase-containing protein of all nidoviruses. *Nucleic Acids Res* **43**, 8416-8434, doi:10.1093/nar/gkv838 (2015).
- 2 Posthuma, C. C., Te Velhuis, A. J. W. & Snijder, E. J. Nidovirus RNA polymerases: Complex enzymes handling exceptional RNA genomes. *Virus Res* **234**, 58-73, doi:10.1016/j.virusres.2017.01.023 (2017).
- 3 McGinnis, S. & Madden, T. L. BLAST: at the core of a powerful and diverse set of sequence analysis tools. *Nucleic Acids Res* **32**, W20-25, doi:10.1093/nar/gkh435 (2004).
- 4 Wheeler, D. L. *et al.* Database resources of the National Center for Biotechnology Information: update. *Nucleic Acids Res* **32**, D35-40, doi:10.1093/nar/gkh073 (2004).
- 5 Madeira, F. *et al.* The EMBL-EBI search and sequence analysis tools APIs in 2019. *Nucleic Acids Res* **47**, W636-W641, doi:10.1093/nar/gkz268 (2019).
- 6 Peti, W. *et al.* Structural genomics of the severe acute respiratory syndrome coronavirus: nuclear magnetic resonance structure of the protein nsP7. *J Virol* **79**, 12905-12913, doi:10.1128/JVI.79.20.12905-12913.2005 (2005).
- 7 Gao, Y. *et al.* Structure of the RNA-dependent RNA polymerase from COVID-19 virus. *Science* **368**, 779-782, doi:10.1126/science.abb7498 (2020).
- 8 Manolaridis, I. *et al.* Structure and genetic analysis of the arterivirus nonstructural protein 7alpha. *J Virol* **85**, 7449-7453, doi:10.1128/JVI.00255-11 (2011).
- 9 van Aken, D., Zevenhoven-Dobbe, J., Gorbalenya, A. E. & Snijder, E. J. Proteolytic maturation of replicase polyprotein pp1a by the nsp4 main proteinase is essential for equine arteritis virus replication and includes internal cleavage of nsp7. *J Gen Virol* **87**, 3473-3482, doi:10.1099/vir.0.82269-0 (2006).
- 10 Zhang, M. *et al.* Mutagenesis analysis of porcine reproductive and respiratory syndrome virus nonstructural protein 7. *Virus Genes* **47**, 467-477, doi:10.1007/s11262-013-0957-4 (2013).

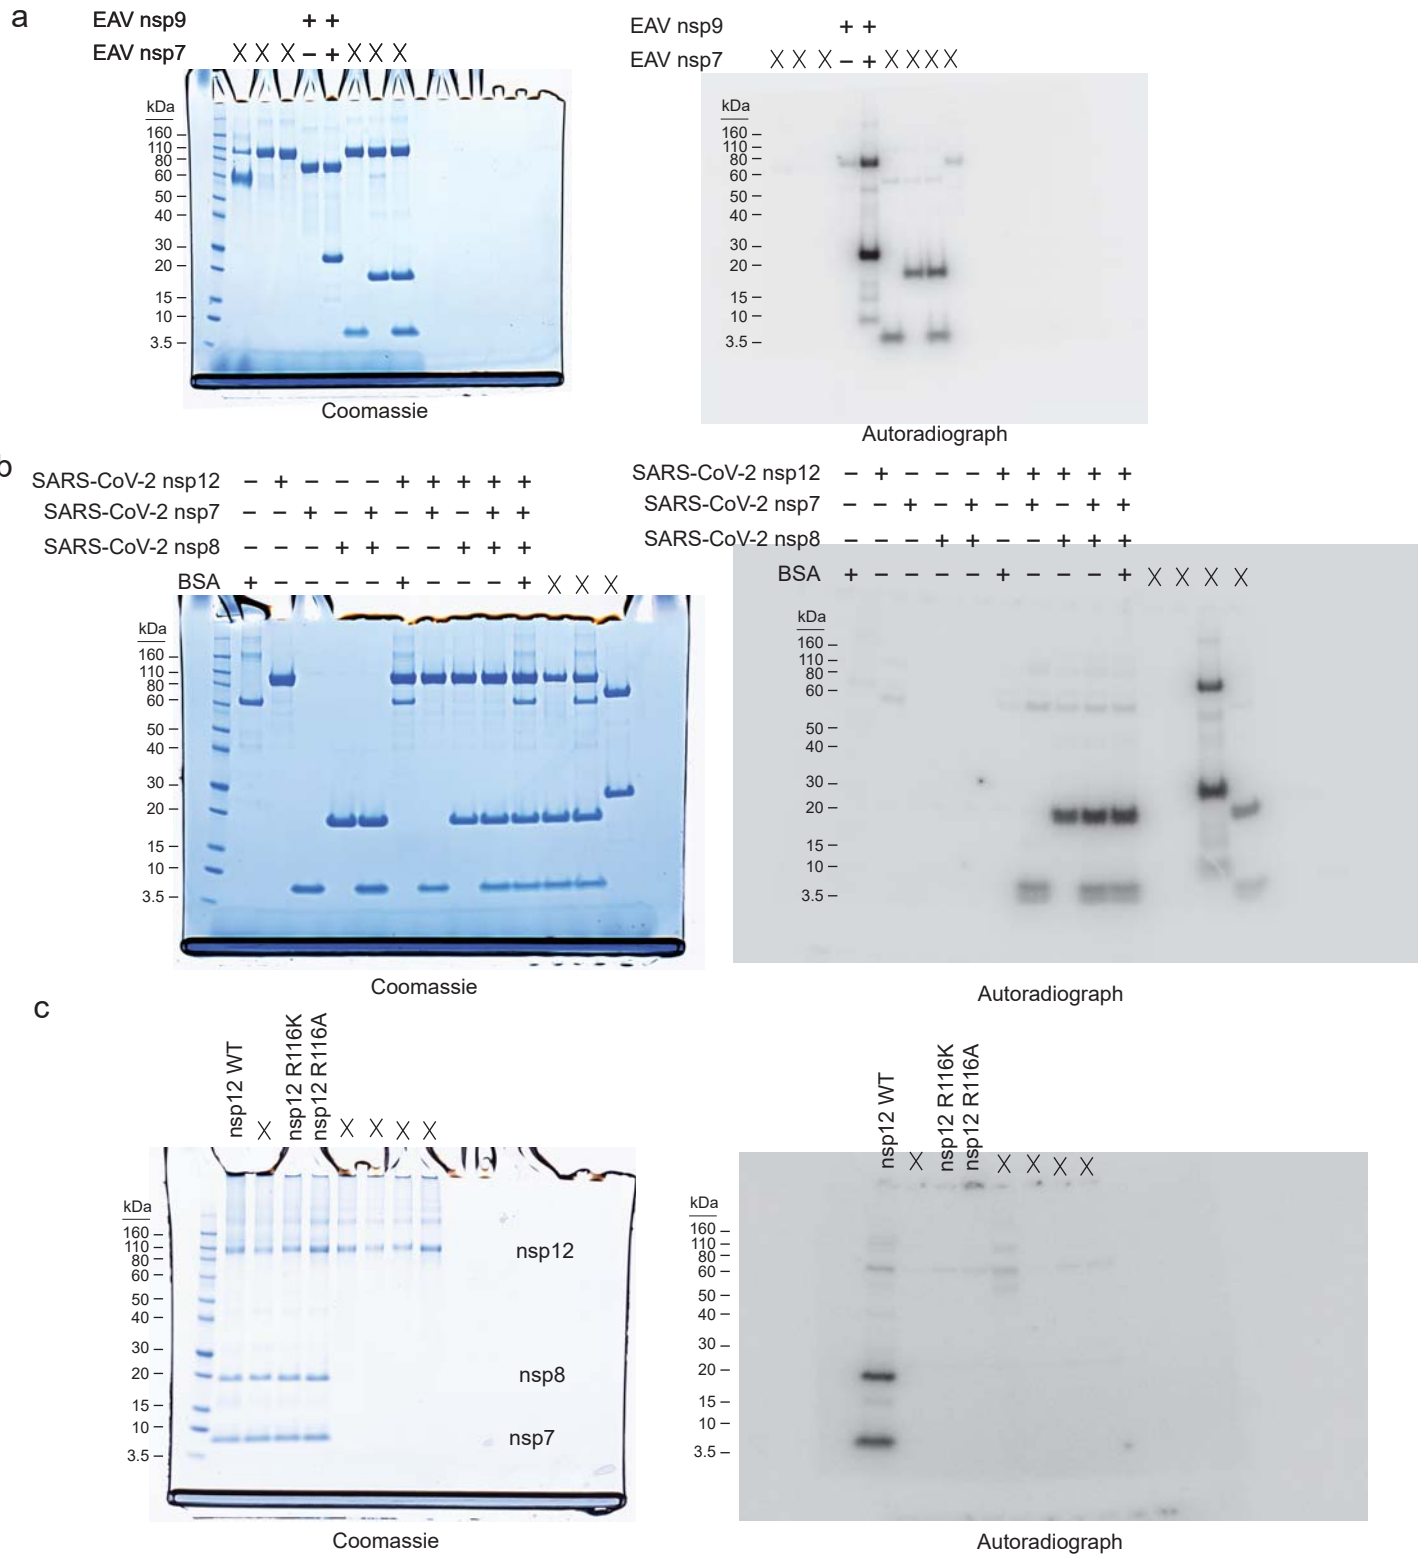

**Supplementary Figure 1. Uncropped gels corresponding to Figure 1.** Panels a, b, and c correspond to Coomassie stained and autoradiography gels in Figure 1a, 1b, and 1c. respectively. Note that two distinct gels were run for each experiment, one for Coomassie and one for autoradiography, and in panels a and b, extra samples were run on the autoradiography gel. "X" denotes lanes that are not depicted in Figure 1.

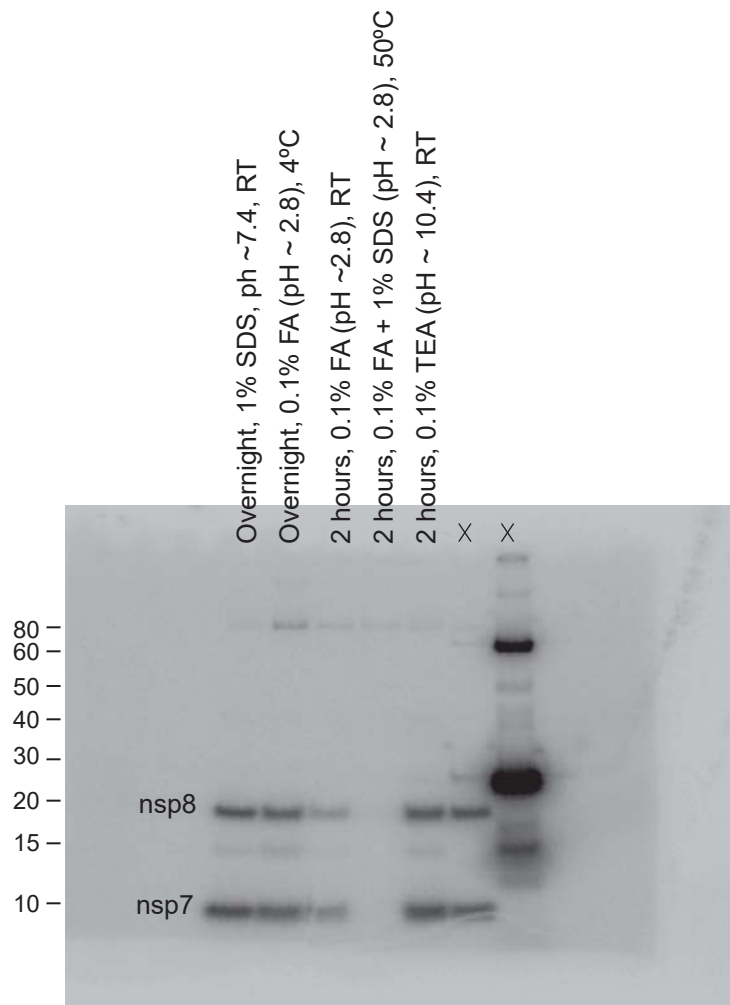

**Supplementary Figure 2. Stability of GMP covalent attachment on SARS-CoV-2 nsp7 and nsp8.** a) SARS-CoV-2 proteins nsp7 and nsp8, radiolabeled with  $^{32}\text{P}$ -GTP, were incubated in the indicated conditions and ran on SDS-PAGE. Autoradiography was used to visualize radioactive proteins. Abbreviations: FA, formic acid; TEA, triethylamine; RT, room temperature. "X" denotes lanes that represents a different experiment performed on the same day. Uncropped gel image is shown.



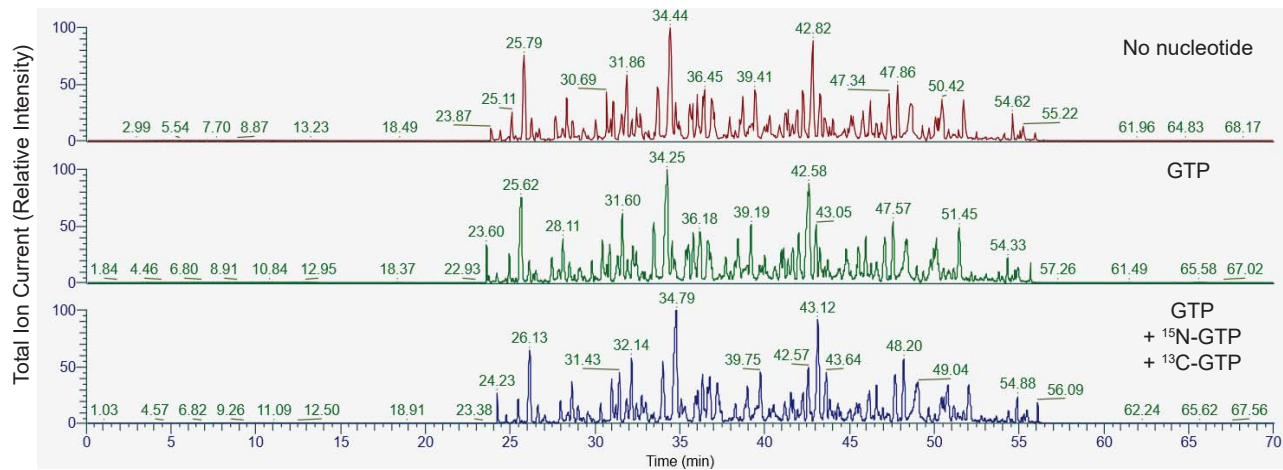

**Supplementary Figure 3. Total Ion Chromatograms for SARS-CoV-2 nucleotidylated proteins.** The total ion chromatograms for Figure 2a and 2b are shown that were subjected to nucleotidylation reactions, as described in the text, and digested with chymotrypsin. The overall peak profiles were similar and peptides eluted at similar retention times between 24 and 57 minutes.

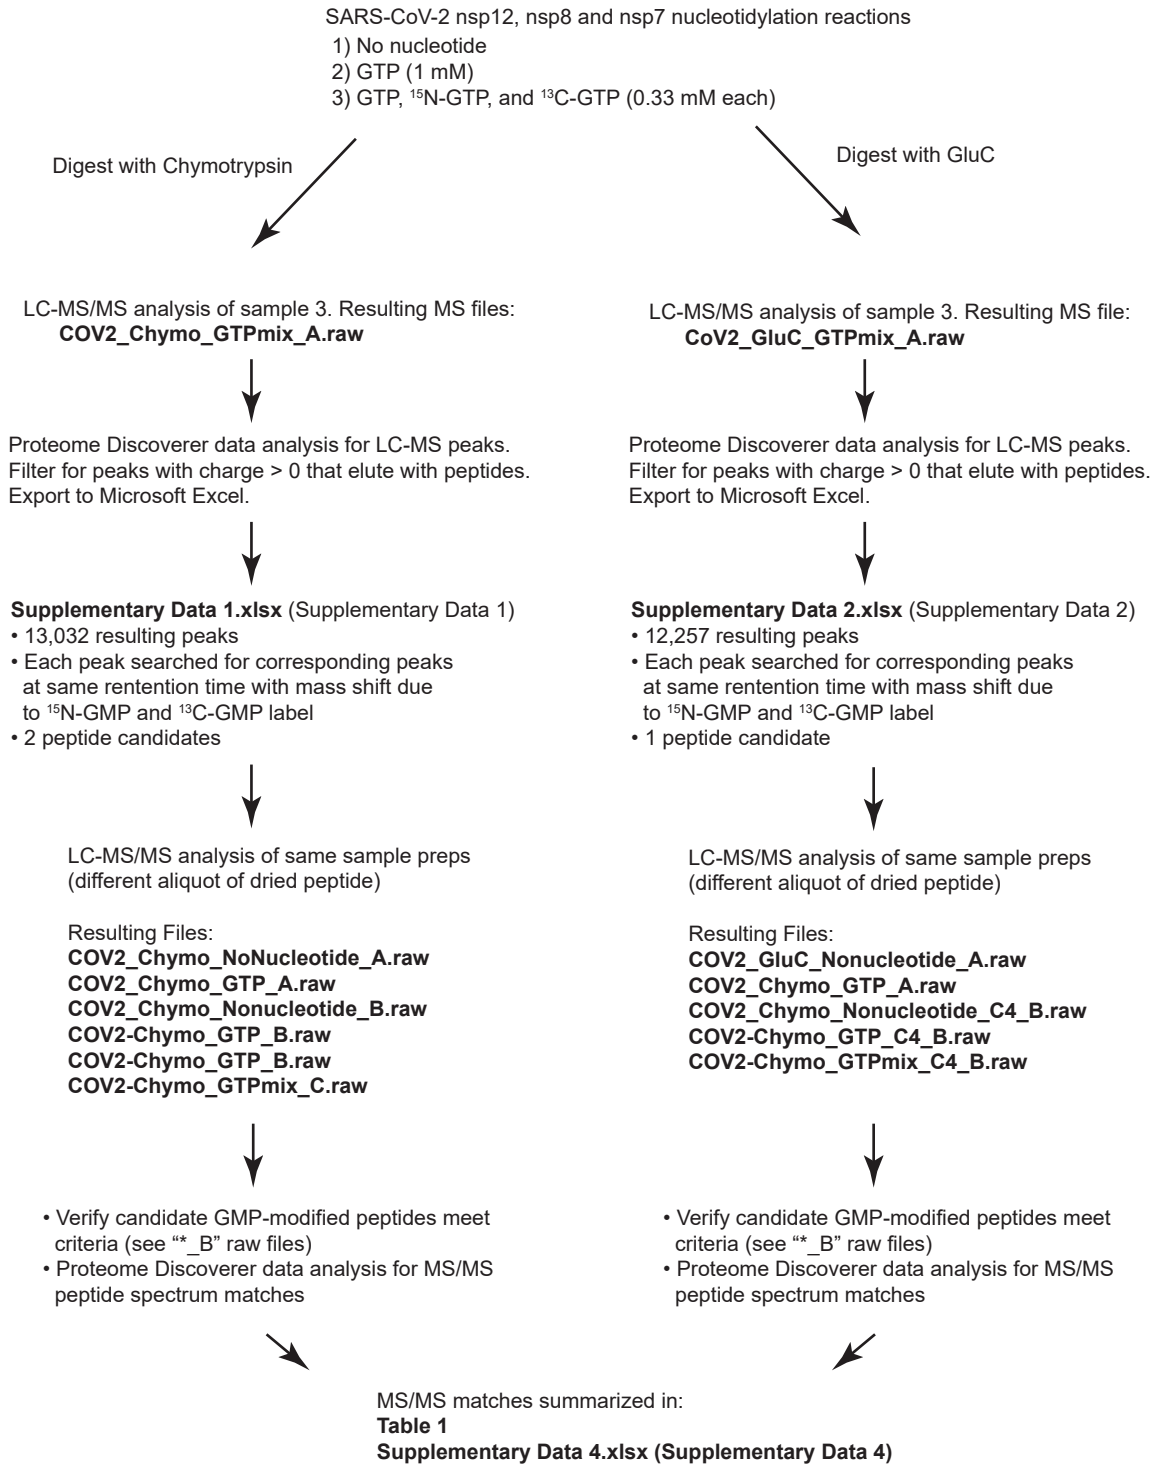

**Supplementary Figure 4. Workflow for identification of SARS-CoV-2 GMP-labeled peptides.** See files and tables indicated for raw data, analysis and results.

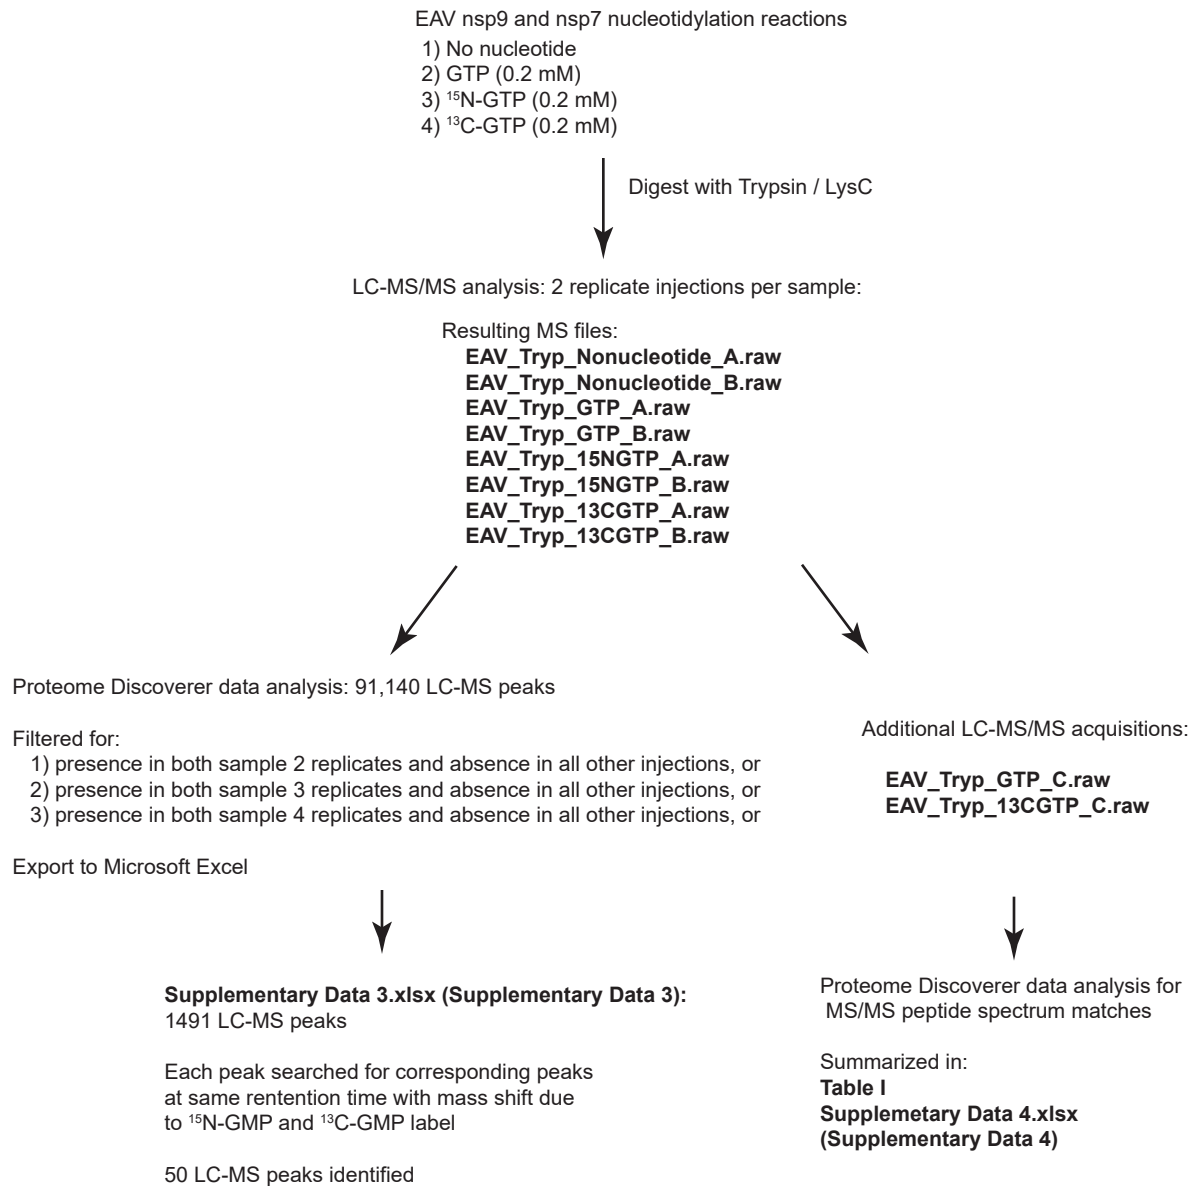

**Supplementary Figure 5. Workflow for identification of EAV GMP-labeled peptides.** See files and tables indicated for raw data, analysis, and results.

## HCD fragmentation

SARS-Cov-2 nsp7  
GMP-modified  
GSKMSDVKC(+57)TSVVL  
m/z 928.4072, charge = +2

|    | b - GMP*    | b*          | Sequence           | y*          | y - GMP*    |    |
|----|-------------|-------------|--------------------|-------------|-------------|----|
| 1  |             | 58.02874    | G                  |             |             | 14 |
| 2  |             | 145.06077   | S                  | 1798.78635  | 1453.73891  | 13 |
| 3  | 273.15573*  | 618.20317   | K-Phosphoguanosine | 1711.75432  | 1366.70688* | 12 |
| 4  | 404.19622*  | 749.24365*  | M                  | 1238.61192* |             | 11 |
| 5  | 491.22824*  | 836.27568   | S                  | 1107.57144* |             | 10 |
| 6  | 606.25519*  | 951.30262*  | D                  | 1020.53941* |             | 9  |
| 7  | 705.32360*  | 1050.37104  | V                  | 905.51247*  |             | 8  |
| 8  | 833.41856*  | 1178.46600* | K                  | 806.44405*  |             | 7  |
| 9  | 993.44921*  | 1338.49665  | C-Carbamidomethyl  | 678.34909*  |             | 6  |
| 10 | 1094.49689* | 1439.54433  | T                  | 518.31844   |             | 5  |
| 11 | 1181.52892* | 1526.57635  | S                  | 417.27076   |             | 4  |
| 12 | 1280.59733* | 1625.64477  | V                  | 330.23873*  |             | 3  |
| 13 | 1379.66575* | 1724.71318  | V                  | 231.17032*  |             | 2  |
| 14 |             |             | L                  | 132.10191   |             | 1  |

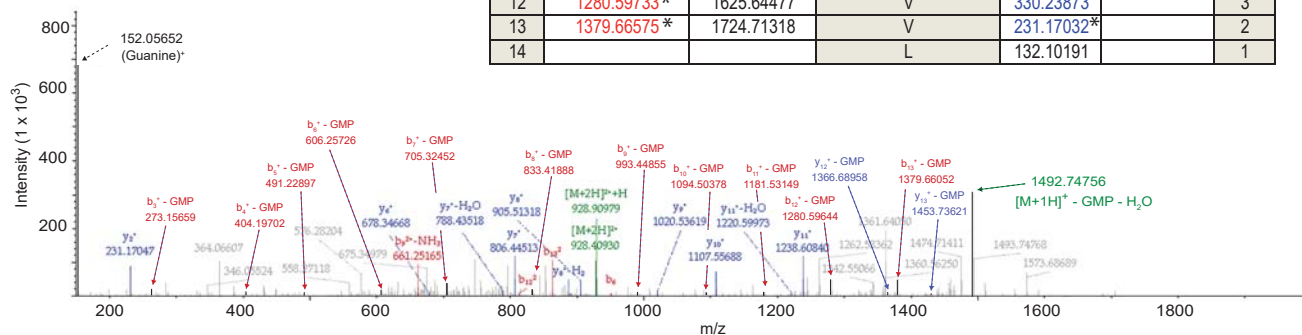

**Supplementary Figure 6. HCD spectrum for GMP-modified SARS-CoV-2 nsp7 peptide 1-14.** The top scoring HCD spectrum match for GMP-modified nsp7 peptide is shown for direct comparison to the ETHcD spectrum (Figure 2d). Note that the modification site was assigned to K3 by Sequest HT for this spectrum. Guanine and fragments that lost the GMP modification were manually labeled after inspection. Red, blue and green coloring indicate b- fragment ions, y- fragment ions, and precursor ions, respectively, that were experimentally observed with a mass +/- 0.04 Da of the calculated, theoretical fragment ion mass. The inset table displays these calculated masses for b- and y-series ions that could be generated following HCD fragmentation. Colored ion fragmentation masses, which are also denoted by asterisks, indicate ions that were observed experimentally.

|    | b*         | c*          | c+H*        | Seq.               | y*          | y**         | z*          | z+H*        |    |
|----|------------|-------------|-------------|--------------------|-------------|-------------|-------------|-------------|----|
| 1  | 58.02874   | 75.05529    | 76.06311    | G                  |             |             |             |             | 17 |
| 2  | 171.11280  | 188.13935   | 189.14718   | L                  | 2309.04588  | 1155.02658  | 2294.03498  | 2295.04281  | 16 |
| 3  | 268.16557  | 285.19212   | 286.19994   | P                  | 2195.96182  | 1098.48455* | 2180.95092  | 2181.95875  | 15 |
| 4  | 741.30797  | 758.33452*  | 759.34234*  | K-Phosphoguanosine | 2098.90906  | 1049.95817* | 2083.89816  | 2084.90598  | 14 |
| 5  | 798.32943  | 815.35598*  | 816.36380*  | G                  | 1625.76666  | 813.38697*  | 1610.75576* | 1611.76358* | 13 |
| 6  | 869.36654  | 886.39309*  | 887.40092   | A                  | 1568.74519  | 784.87624*  | 1553.73430* | 1554.74212  | 12 |
| 7  | 997.42512  | 1014.45167* | 1015.45950* | Q                  | 1497.70808  | 749.35768*  | 1482.69718  | 1483.70501  | 11 |
| 8  | 1110.50918 | 1127.53573* | 1128.54356* | L                  | 1369.64950  | 685.32839   | 1354.63860* | 1355.64643* | 10 |
| 9  | 1239.55178 | 1256.57833* | 1257.58615* | E                  | 1256.56544* | 628.78636   | 1241.55454* | 1242.56237* | 9  |
| 10 | 1425.63109 | 1442.65764* | 1443.66546* | W                  | 1127.52285* | 564.26506*  | 1112.51195* | 1113.51977* | 8  |
| 11 | 1540.65803 | 1557.68458* | 1558.69241* | D                  | 941.44353   | 471.22541   | 926.43263   | 927.44046   | 7  |
| 12 | 1696.75914 | 1713.78569  | 1714.79352  | R                  | 826.41659*  | 413.71193*  | 811.40569*  | 812.41352   | 6  |
| 13 | 1833.81806 | 1850.84461  | 1851.85243* | H                  | 670.31548*  | 335.66138   | 655.30458   | 656.31241   | 5  |
| 14 | 1961.87663 | 1978.90318  | 1979.91101* | Q                  | 533.25657   | 267.13192   | 518.24667   | 519.25349   | 4  |
| 15 | 2090.91923 | 2107.94578  | 2108.95360  | E                  | 405.19799   | 203.10263   | 390.18709   | 391.19492   | 3  |
| 16 | 2219.96182 | 2236.98837  | 2237.99619  | E                  | 276.15540*  | 138.58134   | 261.14450   | 262.15232   | 2  |
| 17 |            |             |             | K                  | 147.11280   | 74.06004    | 132.10191   | 133.10973   | 1  |

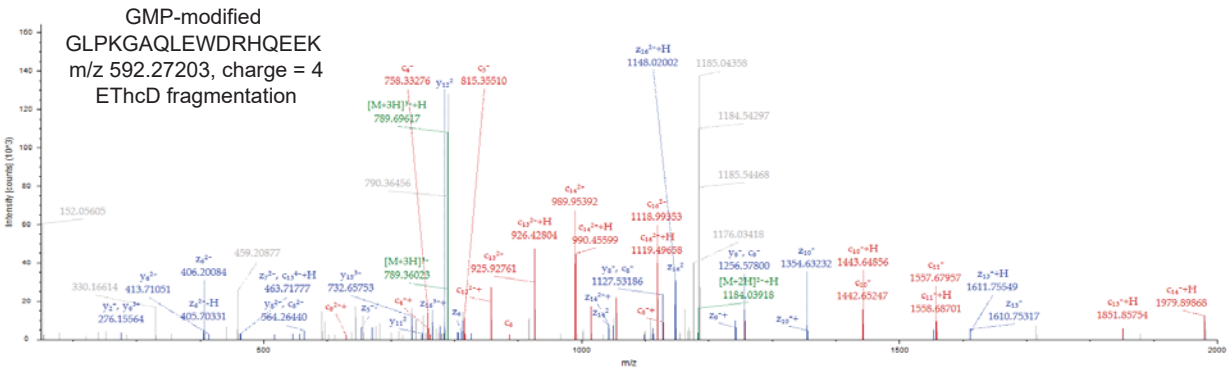

**Supplementary Figure 7. EThcD spectrum for GMP-modified EAV nsp7 peptide 140-156.** The top scoring EThcD spectrum match for the GMP-modified nsp7 peptide in Figure 3a is shown. Red, blue and green coloring indicate c- fragment ions, y- and z- fragment ions, and precursor ions, respectively, that were experimentally observed with a mass +/- 0.04 Da of the calculated, theoretical fragment ion mass. The inset table displays these calculated masses for b-, c-, y- and z- series ions that could be generated following EThcD fragmentation. Colored ion fragments masses, which are also denoted by asterisks, indicate ions that were observed experimentally.

|    | b*         | c*          | c+H*        | Seq.                     | y*         | y*          | z*          | z+H*        |    |
|----|------------|-------------|-------------|--------------------------|------------|-------------|-------------|-------------|----|
| 1  | 58.02874   | 75.05529    | 76.06311    | G                        |            |             |             |             | 17 |
| 2  | 171.11280* | 188.13935   | 189.14718   | L                        | 2319.07945 | 1160.04336* | 2304.06855  | 2305.07637  | 16 |
| 3  | 268.16557  | 285.19212   | 286.19994   | P                        | 2205.99538 | 1103.50133* | 2190.98449  | 2191.99231  | 15 |
| 4  | 751.34153  | 768.36808   | 769.37591   | K-Phosphoguanosine (13C) | 2108.94262 | 1054.97495  | 2093.93172  | 2094.93955  | 14 |
| 5  | 808.36299  | 825.38954*  | 826.39737*  | G                        | 1625.76666 | 813.38697*  | 1610.75576* | 1611.76358* | 13 |
| 6  | 879.40011  | 896.42666*  | 897.43448   | A                        | 1568.74519 | 784.87624*  | 1553.73430* | 1554.74212  | 12 |
| 7  | 1007.45869 | 1024.48523* | 1025.49306* | Q                        | 1497.70808 | 749.35768   | 1482.69718  | 1483.70501  | 11 |
| 8  | 1120.54275 | 1137.56930* | 1138.57712* | L                        | 1369.64950 | 685.32839   | 1354.63860* | 1355.64643* | 10 |
| 9  | 1249.58534 | 1266.61189* | 1267.61972* | E                        | 1256.56544 | 628.78636*  | 1241.55454* | 1242.56237* | 9  |
| 10 | 1435.66466 | 1452.69120* | 1453.69903* | W                        | 1127.52285 | 564.26506*  | 1112.51195  | 1113.51977* | 8  |
| 11 | 1550.69160 | 1567.71815* | 1568.72597* | D                        | 941.44353* | 471.22541*  | 926.43263*  | 927.44046*  | 7  |
| 12 | 1706.79271 | 1723.81926* | 1724.82708* | R                        | 826.41659* | 413.71193*  | 811.40569*  | 812.41352*  | 6  |
| 13 | 1843.85162 | 1860.87817* | 1861.88600* | H                        | 670.31548* | 335.66138   | 655.30458*  | 656.31241   | 5  |
| 14 | 1971.91020 | 1988.93675* | 1989.94457* | Q                        | 533.25657  | 267.13192   | 518.24567   | 519.25349   | 4  |
| 15 | 2100.95279 | 2117.97934  | 2118.98717  | E                        | 405.19799  | 203.10263   | 390.18709   | 391.19492   | 3  |
| 16 | 2229.99538 | 2247.02193  | 2248.02976  | E                        | 276.15540* | 138.58134   | 261.14450   | 262.15232   | 2  |
| 17 |            |             |             | K                        | 147.11280  | 74.06004    | 132.10191   | 133.10973   | 1  |

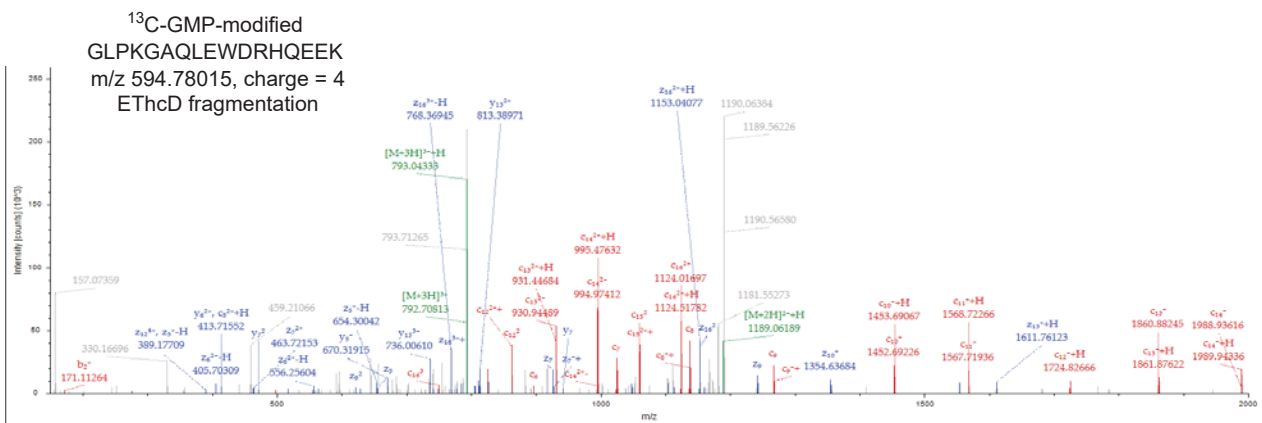

**Supplementary Figure 8. ETHcD spectrum for <sup>13</sup>C-GMP-modified EAV nsp7 peptide 140-156.** The top scoring ETHcD spectrum match for the <sup>13</sup>C-GMP-modified nsp7 peptide in Figure 3b is shown. Red, blue and green coloring indicate c- and b- fragment ions, y- and z- fragment ions, and precursor ions, respectively, that were experimentally observed with a mass +/- 0.04 Da of the calculated, theoretical fragment ion mass. The inset table displays these calculated masses for b-, c-, y- and z- series ions that could be generated following ETHcD fragmentation. Colored ion fragments masses, which are also denoted by asterisks, indicate ions that were observed experimentally.

|    | b*         | c*          | c+H*        | Seq.                     | y*          | z*          | z+H*        | z-H*        |    |
|----|------------|-------------|-------------|--------------------------|-------------|-------------|-------------|-------------|----|
| 1  | 157.10839  | 174.13494   | 175.14276   | R                        |             |             |             |             | 17 |
| 2  | 271.15131  | 288.17786*  | 289.18569   | N                        | 2135.83643  | 2120.82553  | 2121.83336  | 2119.81771  | 16 |
| 3  | 342.18843  | 359.21498*  | 360.22280   | A                        | 2021.79350  | 2006.78260  | 2007.79043  | 2005.77478  | 15 |
| 4  | 399.20989  | 416.23644*  | 417.24427*  | G                        | 1950.75639  | 1935.74549* | 1936.75332  | 1934.73767* | 14 |
| 5  | 514.23684  | 531.26338*  | 532.27121*  | D                        | 1893.73493  | 1878.72403* | 1879.73185* | 1877.71620* | 13 |
| 6  | 629.26378  | 646.29033*  | 647.29815*  | D                        | 1778.70798  | 1763.69708* | 1764.70491* | 1762.68926* | 12 |
| 7  | 744.29072  | 761.31727*  | 762.32510*  | D                        | 1663.68104  | 1648.67014* | 1649.67797  | 1647.66232* | 11 |
| 8  | 891.35914  | 908.38568*  | 909.39351*  | F                        | 1548.65410  | 1533.64320* | 1534.65102* | 1532.63537* | 10 |
| 9  | 962.39625  | 979.42280*  | 980.43062   | A                        | 1401.58568  | 1386.57478* | 1387.58261* | 1385.56696* | 9  |
| 10 | 1061.46466 | 1078.49121* | 1079.49904* | V                        | 1330.54857  | 1315.53767  | 1316.54550  | 1314.52985* | 8  |
| 11 | 1148.49669 | 1165.52324* | 1166.53107* | S                        | 1231.48016* | 1216.46926* | 1217.47708  | 1215.46143* | 7  |
| 12 | 1262.53962 | 1279.56617* | 1280.57399* | N                        | 1144.44813* | 1129.43723* | 1130.44505  | 1128.42940* | 6  |
| 13 | 1377.56656 | 1394.59311* | 1395.60094* | D                        | 1030.40520  | 1015.39430* | 1016.40213  | 1014.38648* | 5  |
| 14 | 1540.62989 | 1557.65644* | 1558.66426  | Y                        | 915.37826   | 900.36736*  | 901.37518   | 899.35953*  | 4  |
| 15 | 1639.69830 | 1656.72485* | 1657.73268* | V                        | 752.31493   | 737.30403   | 738.31186   | 736.29621*  | 3  |
| 16 | 2117.82587 | 2134.85242  | 2135.86024  | K-phosphoguanosine (15N) | 653.24652*  | 638.23562   | 639.24344   | 637.22779*  | 2  |
| 17 |            |             |             | R                        | 175.11895*  | 160.10805   | 161.11588   | 159.10023*  | 1  |

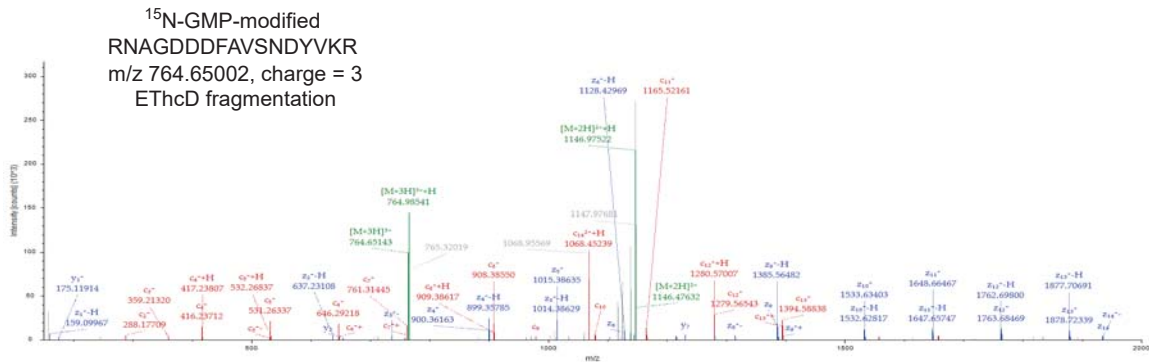

**Supplementary Figure 9. ETHcD spectrum for <sup>15</sup>N-GMP-modified EAV nsp7 peptide 157-173.** The top scoring ETHcD spectrum match for the <sup>15</sup>N-GMP-modified nsp7 peptide in Figure 3c is shown. Red, blue and green coloring indicate c- fragment ions, y- and z- fragment ions, and precursor ions, respectively, that were experimentally observed with a mass +/- 0.04 Da of the calculated, theoretical fragment ion mass. The inset table displays these calculated masses for b-, c-, y- and z- series ions that could be generated following ETHcD fragmentation. Colored ion fragmentations masses, which are also denoted by asterisks, indicate ions that were observed experimentally.

|    | $b^+$       | $b^{2+}$   | Sequence                 | $y^+$      | $y^+ - \text{GMP}$ |    |
|----|-------------|------------|--------------------------|------------|--------------------|----|
| 1  | 157.10839*  | 79.05783   | R                        |            |                    | 17 |
| 2  | 271.15131*  | 136.07930  | N                        | 2135.83643 | 1785.80383         | 16 |
| 3  | 342.18843   | 171.59785  | A                        | 2021.79350 | 1671.76090         | 15 |
| 4  | 399.20989*  | 200.10858  | G                        | 1950.75639 | 1600.72379         | 14 |
| 5  | 514.23684*  | 257.62206  | D                        | 1893.73493 | 1543.70233         | 13 |
| 6  | 629.26378*  | 315.13553  | D                        | 1778.70798 | 1428.67538*        | 12 |
| 7  | 744.29072*  | 372.64900  | D                        | 1663.68104 | 1313.64844*        | 11 |
| 8  | 891.35914*  | 446.18321  | F                        | 1548.65410 | 1198.62150*        | 10 |
| 9  | 962.39625   | 481.70176* | A                        | 1401.58568 | 1051.55308         | 9  |
| 10 | 1061.46466* | 531.23597  | V                        | 1330.54857 | 980.51597*         | 8  |
| 11 | 1148.49669* | 574.75198  | S                        | 1231.48016 | 881.44756*         | 7  |
| 12 | 1262.53962* | 631.77345  | N                        | 1144.44813 | 794.41553*         | 6  |
| 13 | 1377.56656* | 689.28692  | D                        | 1030.40520 | 680.37260*         | 5  |
| 14 | 1540.62989* | 770.81858  | Y                        | 915.37826  | 565.34566*         | 4  |
| 15 | 1639.69830* | 820.35279  | V                        | 752.31493  | 402.28233*         | 3  |
| 16 | 1767.79327* | 884.40027  | K                        | 653.24652  | 303.21392*         | 2  |
| 17 |             |            | R-Phosphoguanosine (N15) | 525.15155  | 175.11895*         | 1  |

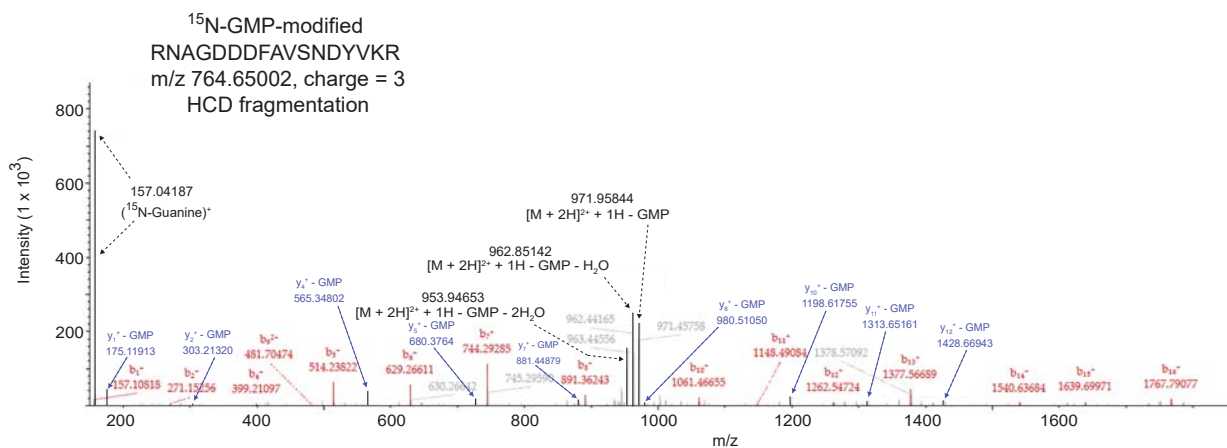

**Supplementary Figure 10. HCD spectrum for  $^{15}\text{N}$ -GMP-modified EAV nsp7 peptide 157-173 with GMP-modification loss labeling.** The top scoring HCD spectrum match for the  $^{15}\text{N}$ -GMP-modified nsp7 peptide in Figure 3c is relabeled with fragment ions that have lost the GMP modification. Red and blue coloring indicate b- fragment ions and y-fragment ions that were experimentally observed with a mass  $\pm 0.04$  Da of the calculated, theoretical fragment ion mass. The inset table displays these calculated masses for b- and y-series ions that could be generated following HCD fragmentation. Colored ion fragment masses, which are also denoted by asterisks, indicate ions that were observed experimentally.



**a** EAV nsp7 WT →

| EAV nsp7 WT, 1-SLATLAALITDDDFQFLSDVLDLR-24 (trypsin) |          |     |                 |
|------------------------------------------------------|----------|-----|-----------------|
| charge state                                         | m/z      | GMP | total area      |
| 2                                                    | 1344.147 | No  | 1.67E+08        |
| *3                                                   | 896.434  |     |                 |
| 4                                                    | 672.578  |     |                 |
| 2                                                    | 1516.671 |     |                 |
| *3                                                   | 1011.450 | Yes | 1.21E+07 (6.7%) |
| 4                                                    | 758.839  |     |                 |

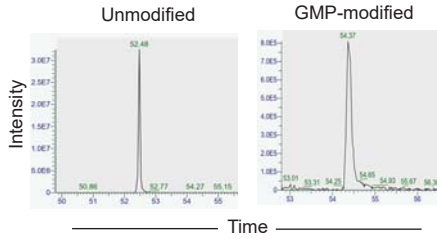

EAV nsp7 T3A →

| EAV nsp7 T3A, 1-SLAATLAALITDDDFQFLSDVLDLR-24 (trypsin) |           |     |                 |
|--------------------------------------------------------|-----------|-----|-----------------|
| charge state                                           | m/z       | GMP | total area      |
| 2                                                      | 1329.142  | No  | 6.03E+09        |
| *3                                                     | 886.43064 |     |                 |
| 4                                                      | 665.07493 |     |                 |
| 2                                                      | 1501.6657 |     |                 |
| *3                                                     | 1001.4464 | Yes | 2.09E+08 (3.3%) |
| 4                                                      | 751.33678 |     |                 |

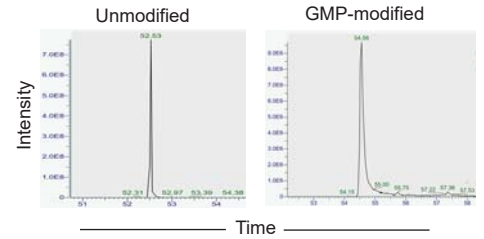

**b** EAV nsp7 WT →

| EAV nsp7 WT, 140-GLPAGALEWDR-151 (trypsin) |          |     |                  |
|--------------------------------------------|----------|-----|------------------|
| charge state                               | m/z      | GMP | total area       |
| 2                                          | 685.365  | No  | 1.63E+06         |
| *3                                         | 457.246  |     |                  |
| 4                                          | 343.1864 |     |                  |
| 2                                          | 857.8887 |     |                  |
| *3                                         | 572.2618 | Yes | 2.83E+06 (63.5%) |
| 4                                          | 429.4483 |     |                  |

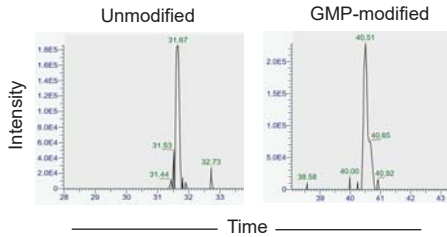

EAV nsp7 K143A →

| EAV nsp7 K143A, 140-GLPAGALEWDR-150 (trypsin) |          |     |            |
|-----------------------------------------------|----------|-----|------------|
| charge state                                  | m/z      | GMP | total area |
| 1                                             | 1312.664 | No  | 2.77E+08   |
| *2                                            | 656.8361 |     |            |
| 3                                             | 438.2267 |     |            |
| 1                                             | 1657.712 |     |            |
| *2                                            | 829.3598 | Yes | Not Found  |
| 3                                             | 553.2425 |     |            |

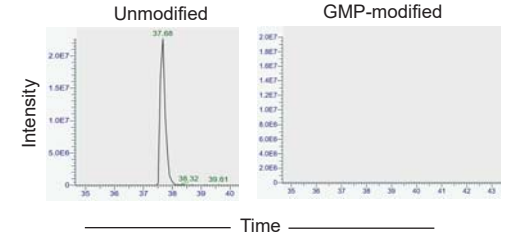

**c** EAV nsp7 WT →

| EAV nsp7 WT, 150-DRHQEERKRNAGDDDFAVSNDY-170 (chymotrypsin) |          |     |                 |
|------------------------------------------------------------|----------|-----|-----------------|
| charge state                                               | m/z      | GMP | total area      |
| 2                                                          | 1241.037 | No  | 7.48E+09        |
| 3                                                          | 827.6939 |     |                 |
| *4                                                         | 621.0224 |     |                 |
| 2                                                          | 1413.561 |     |                 |
| 3                                                          | 942.7097 | Yes | 9.10E+07 (1.2%) |
| *4                                                         | 707.2842 |     |                 |

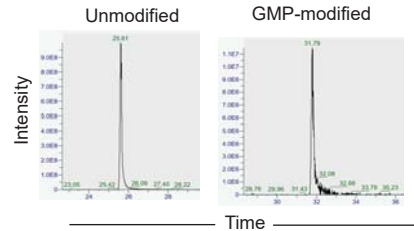

EAV nsp7 K156A →

| EAV nsp7 K156A, 150-DRHQEERKRNAGDDDFAVSNDY-170 (chymotrypsin) |          |     |            |
|---------------------------------------------------------------|----------|-----|------------|
| charge state                                                  | m/z      | GMP | total area |
| 2                                                             | 1212.508 | No  | 2.96E+09   |
| 3                                                             | 808.6746 |     |            |
| *4                                                            | 606.7579 |     |            |
| 2                                                             | 1385.032 |     |            |
| 3                                                             | 923.6904 | Yes | Not Found  |
| *4                                                            | 693.0198 |     |            |

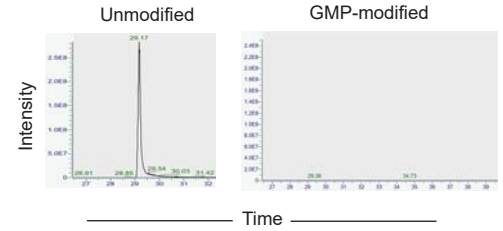

**d** EAV nsp7 WT →

| EAV nsp7 WT, 158-NAGDDDFAVSNDYVKR-173 (trypsin) |          |     |                |
|-------------------------------------------------|----------|-----|----------------|
| charge state                                    | m/z      | GMP | total area     |
| 2                                               | 893.4058 | No  | 2.02E+08       |
| *3                                              | 595.940  |     |                |
| 4                                               | 447.2068 |     |                |
| 2                                               | 1065.93  |     |                |
| *3                                              | 710.9556 | Yes | 1.46E+6 (0.7%) |
| 4                                               | 533.4687 |     |                |

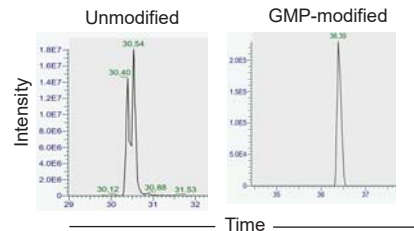

EAV nsp7 K172A →

| EAV nsp7 K172A, 158-NAGDDDFAVSNDYVAR-173 (trypsin) |          |     |            |
|----------------------------------------------------|----------|-----|------------|
| charge state                                       | m/z      | GMP | total area |
| *2                                                 | 864.8769 | No  | 3.13E+09   |
| 3                                                  | 576.9295 |     |            |
| 4                                                  | 432.9423 |     |            |
| *2                                                 | 1037.401 |     |            |
| 3                                                  | 691.9363 | Yes | Not Found  |
| 4                                                  | 519.2042 |     |            |

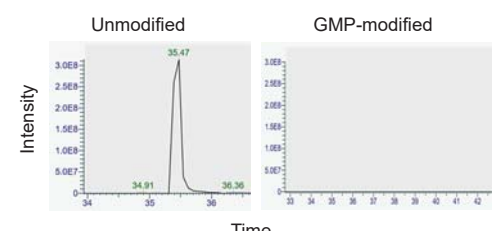

**e** EAV nsp9 WT →

| EAV nsp9 WT, 369-SNLQATMATCR-381 (trypsin) |          |     |                 |
|--------------------------------------------|----------|-----|-----------------|
| charge state                               | m/z      | GMP | total area      |
| 2                                          | 741.3638 | No  | 1.32E+09        |
| 3                                          | 494.5785 |     |                 |
| *4                                         | 371.1858 |     |                 |
| 2                                          | 913.8875 |     |                 |
| 3                                          | 609.5943 | Yes | 9.77E+06 (0.7%) |
| *4                                         | 457.4477 |     |                 |

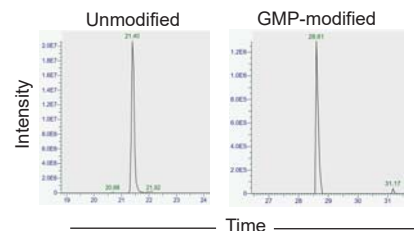

EAV nsp9 K380A →

| EAV nsp9 K380A, 369-SNLQATMATCR-381 (trypsin) |          |     |            |
|-----------------------------------------------|----------|-----|------------|
| charge state                                  | m/z      | GMP | total area |
| *2                                            | 712.8349 | No  | 4.38E+09   |
| 3                                             | 475.5592 |     |            |
| 4                                             | 356.9214 |     |            |
| *2                                            | 885.3586 |     |            |
| 3                                             | 590.575  | Yes | Not Found  |
| 4                                             | 443.1832 |     |            |

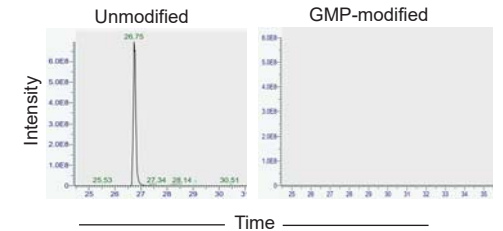

**Supplementary Figure 11. LC-MS data for WT and mutant EAV nsp proteins.**

GMP-labeled EAV WT protein digests were compared to similar samples prepared from those containing (a) EAV nsp7 T3A, (b) EAV nsp7 K143A, (c) EAV nsp7 K156A, (d) EAV nsp7 K172A, or (e) EAV nsp9 K380A. For each mutant, one tryptic or chymotryptic peptide containing the mutation is shown. The m/z values for these peptides were calculated for charge states 1-5 (only three charges states are shown). The LC-MS peak of the most abundant m/z peak (indicated by an asterisk) was extracted from the raw data for both the unmodified and GMP-modified peptides as labeled. The only EAV nsp mutant that was still modified by GMP was EAV nsp7 T3A. Total area of all m/z peaks were calculated and the GMP-modified percentage was denoted in brackets. For the EAV nsp7 K156 GMP-modification site, a chymotryptic peptide containing the site was analyzed because the originally tryptic peptide was not observed in samples for unknown reasons. The percentage of GMP-modified peptide for K143 is likely overestimated because tryptic cleavage at K143 could occur in the absence of the GMP-modification, as opposed to the 140-151 peptide where the GMP modification causes a missed cleavage event.

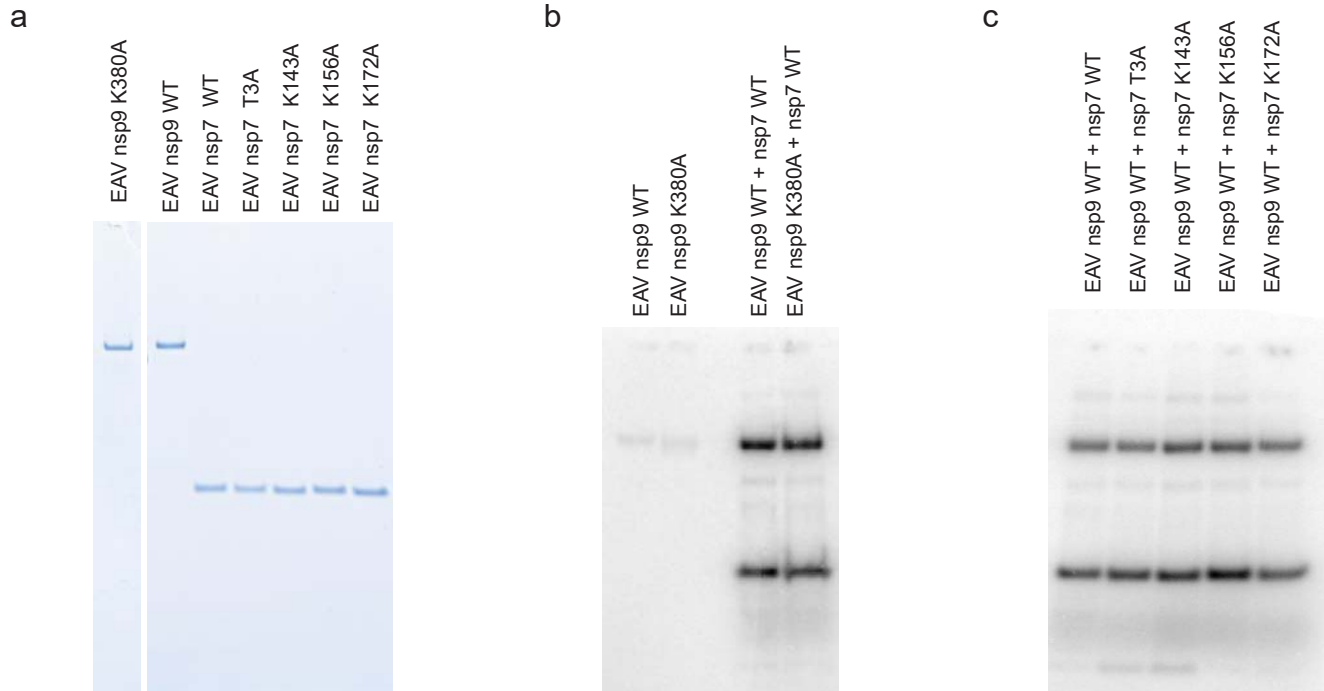

**Supplementary Figure 12. EAV nsp7 and nsp9 mutant proteins.** a) Purified EAV nsp7 and nsp9 WT proteins were compared to equal quantities of EAV nsp9 K380A, EAV nsp7 T3A, EAV nsp7 K143A, EAV nsp7 K156A, and EAV nsp7 K172A. Proteins were analyzed by SDS-PAGE and stained with Coomassie. b) GMP radiolabeling of EAV nsp9 WT compared to EAV nsp9 K380A in the absence and presence of EAV nsp7 WT. c) GMP radiolabeling of EAV nsp7 WT and mutant proteins in the presence of EAV nsp9. Uncropped gels are shown in Supplementary Figure 13.

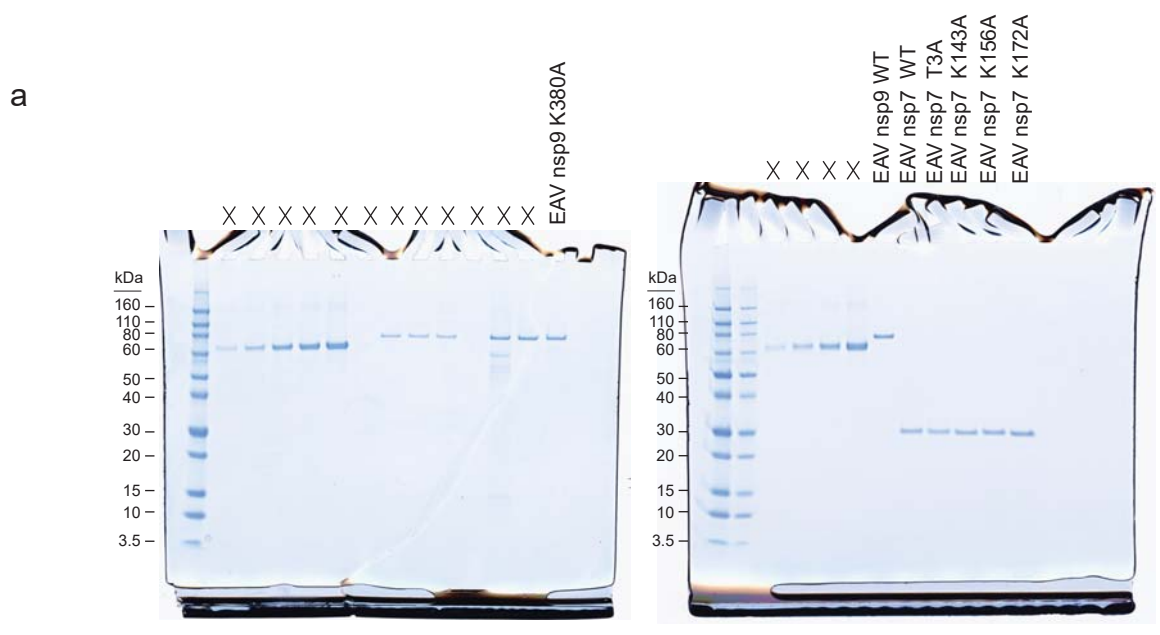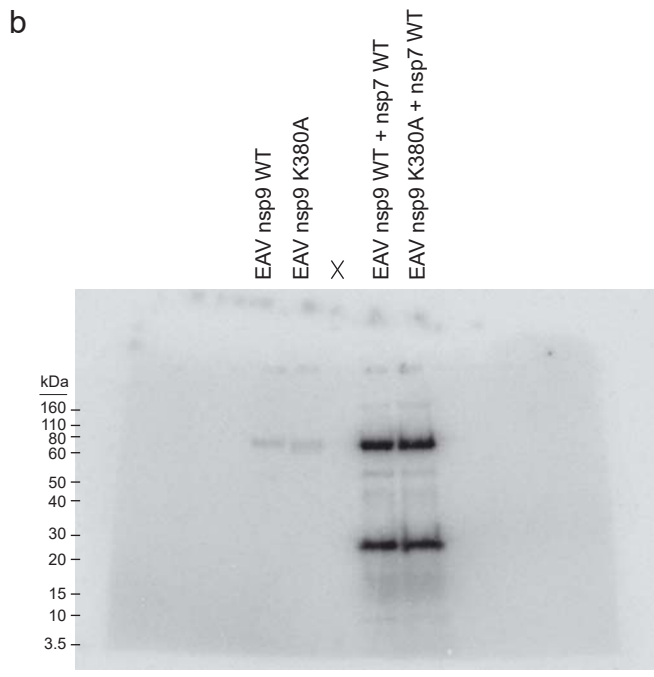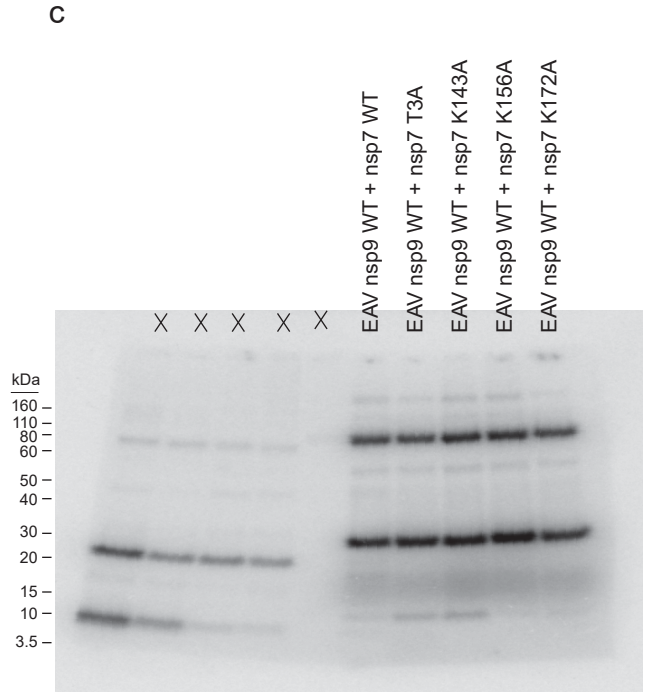

**Supplementary Figure 13. Uncropped gels for Supplementary Figure 12.** Panels a, b, and c correspond to Coomassie stained and autoradiography gels in Figure 12a, 12b, and 12c. respectively.

a

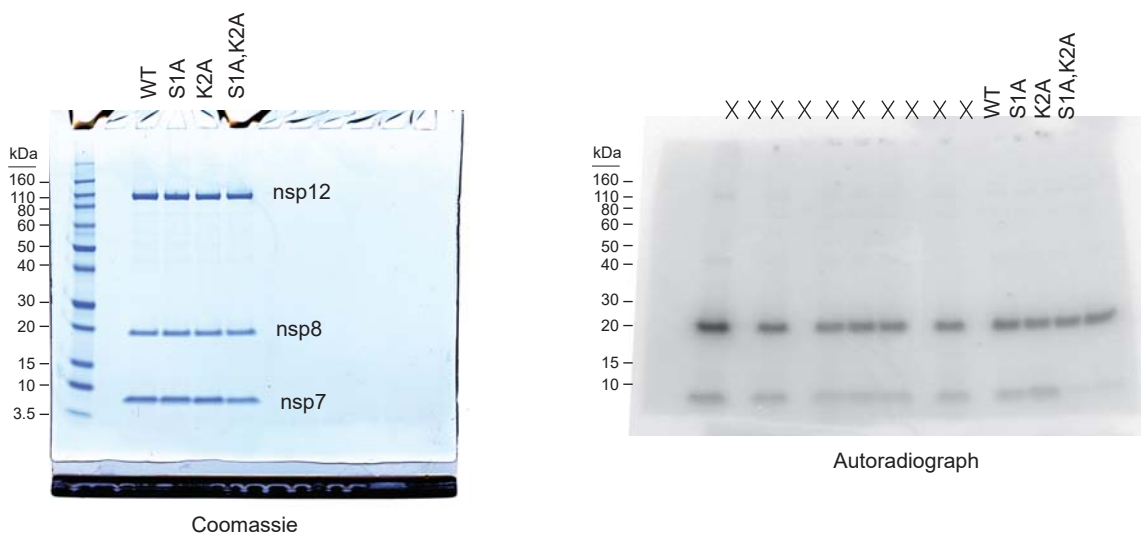

**Supplementary Figure 14. Uncropped gels of Figure 4.**  
Panel a corresponds to Coomassie stained and autoradiography gel in Figure 4a.

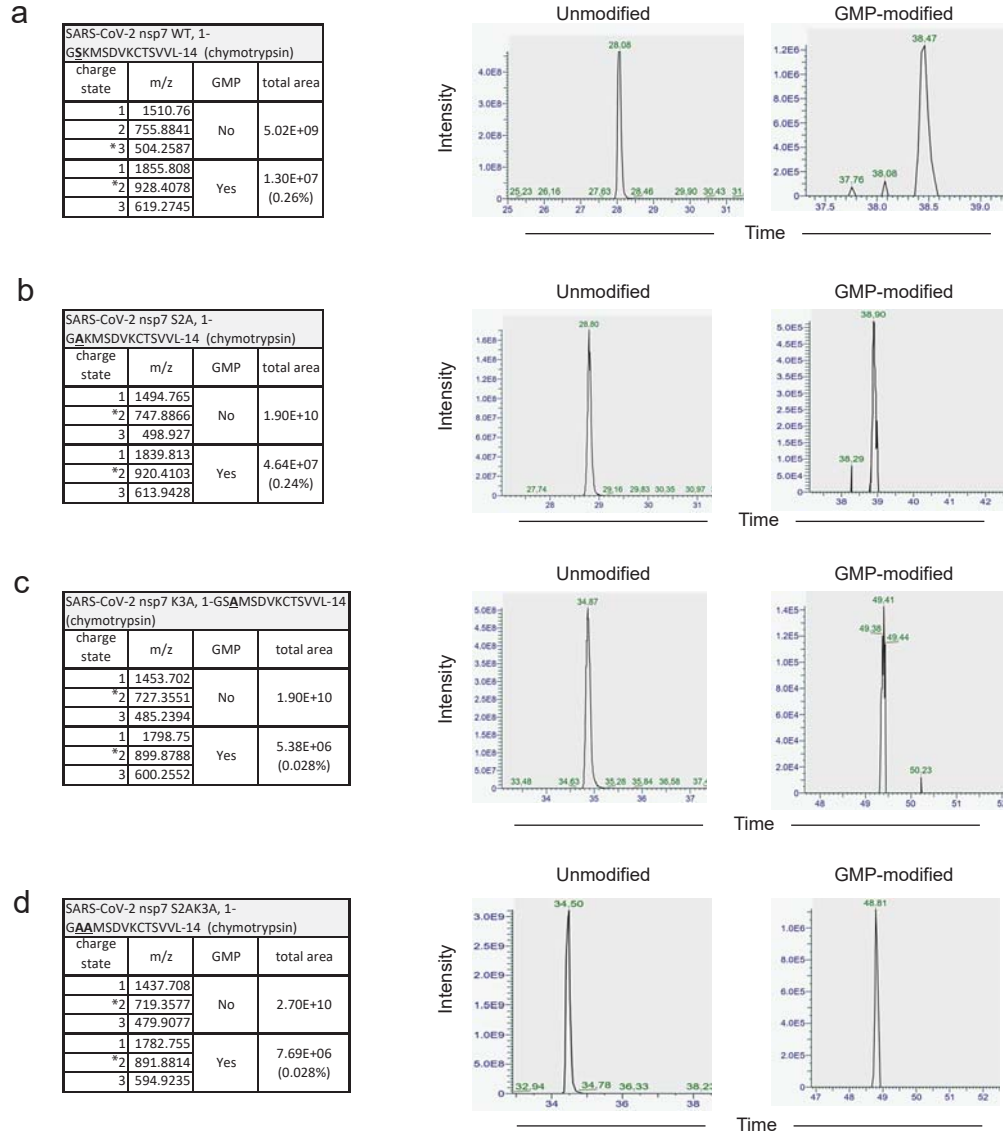

**Supplementary Figure 15. LC-MS data for WT and mutant SARS-CoV-2 nsp7 proteins.** GMP-labeled SARS-CoV-2 WT protein digests (a) were compared to similar samples prepared from those containing (b) SARS-CoV-2 nsp7 S2A, (c) SARS-CoV-2 nsp7 K3A, and (d) SARS-CoV-2 nsp7 S2AK3A. For each mutant, the chymotryptic peptide 1-14 containing the mutation is shown. The m/z values for these peptides were calculated for charge states 1-5 (only three charges states are shown). The LC-MS peak of the most abundant m/z peak (indicated by an asterisk) was extracted from the raw data for both the unmodified and GMP-modified peptides as labeled. Total area of all m/z peaks were calculated, and the GMP-modified percentage was denoted in brackets.

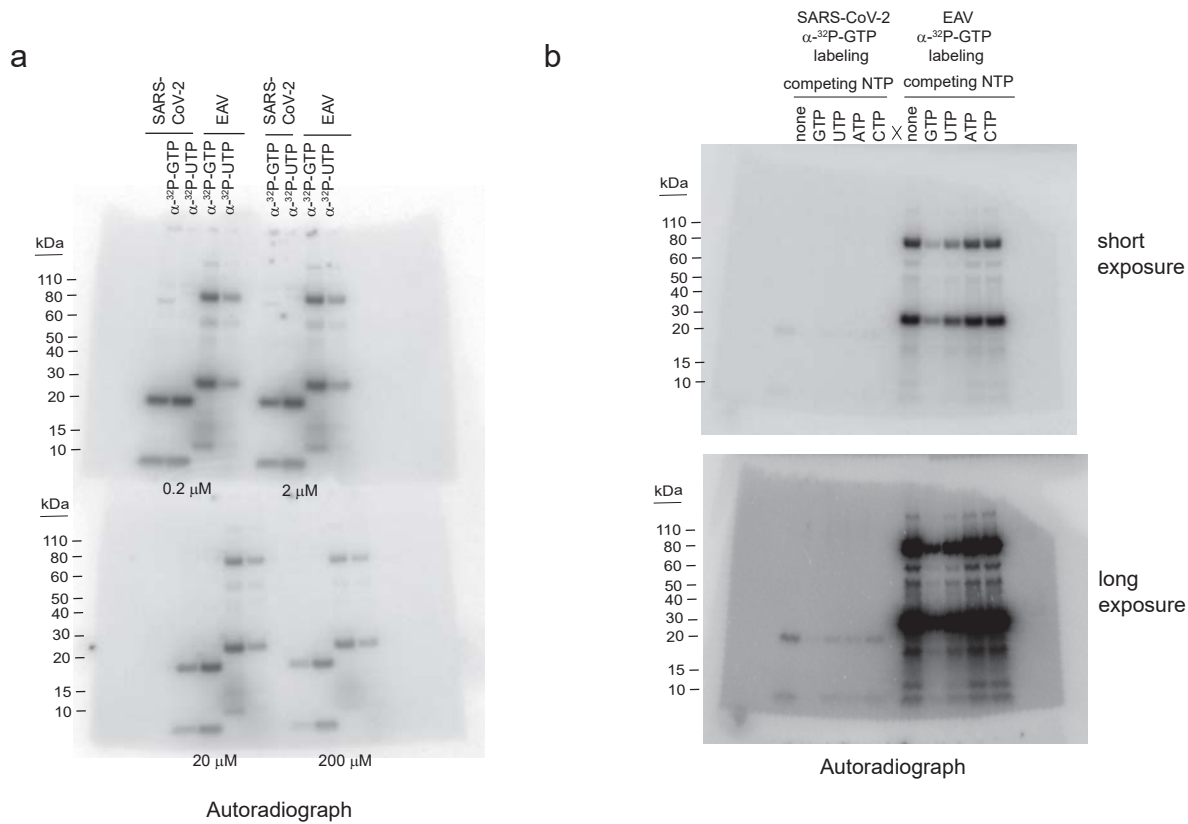

**Supplementary Figure 16. Uncropped gels of Figure 5.**  
 Panels a and b correspond to autoradiography gels in Figure 5a and 5b, respectively.

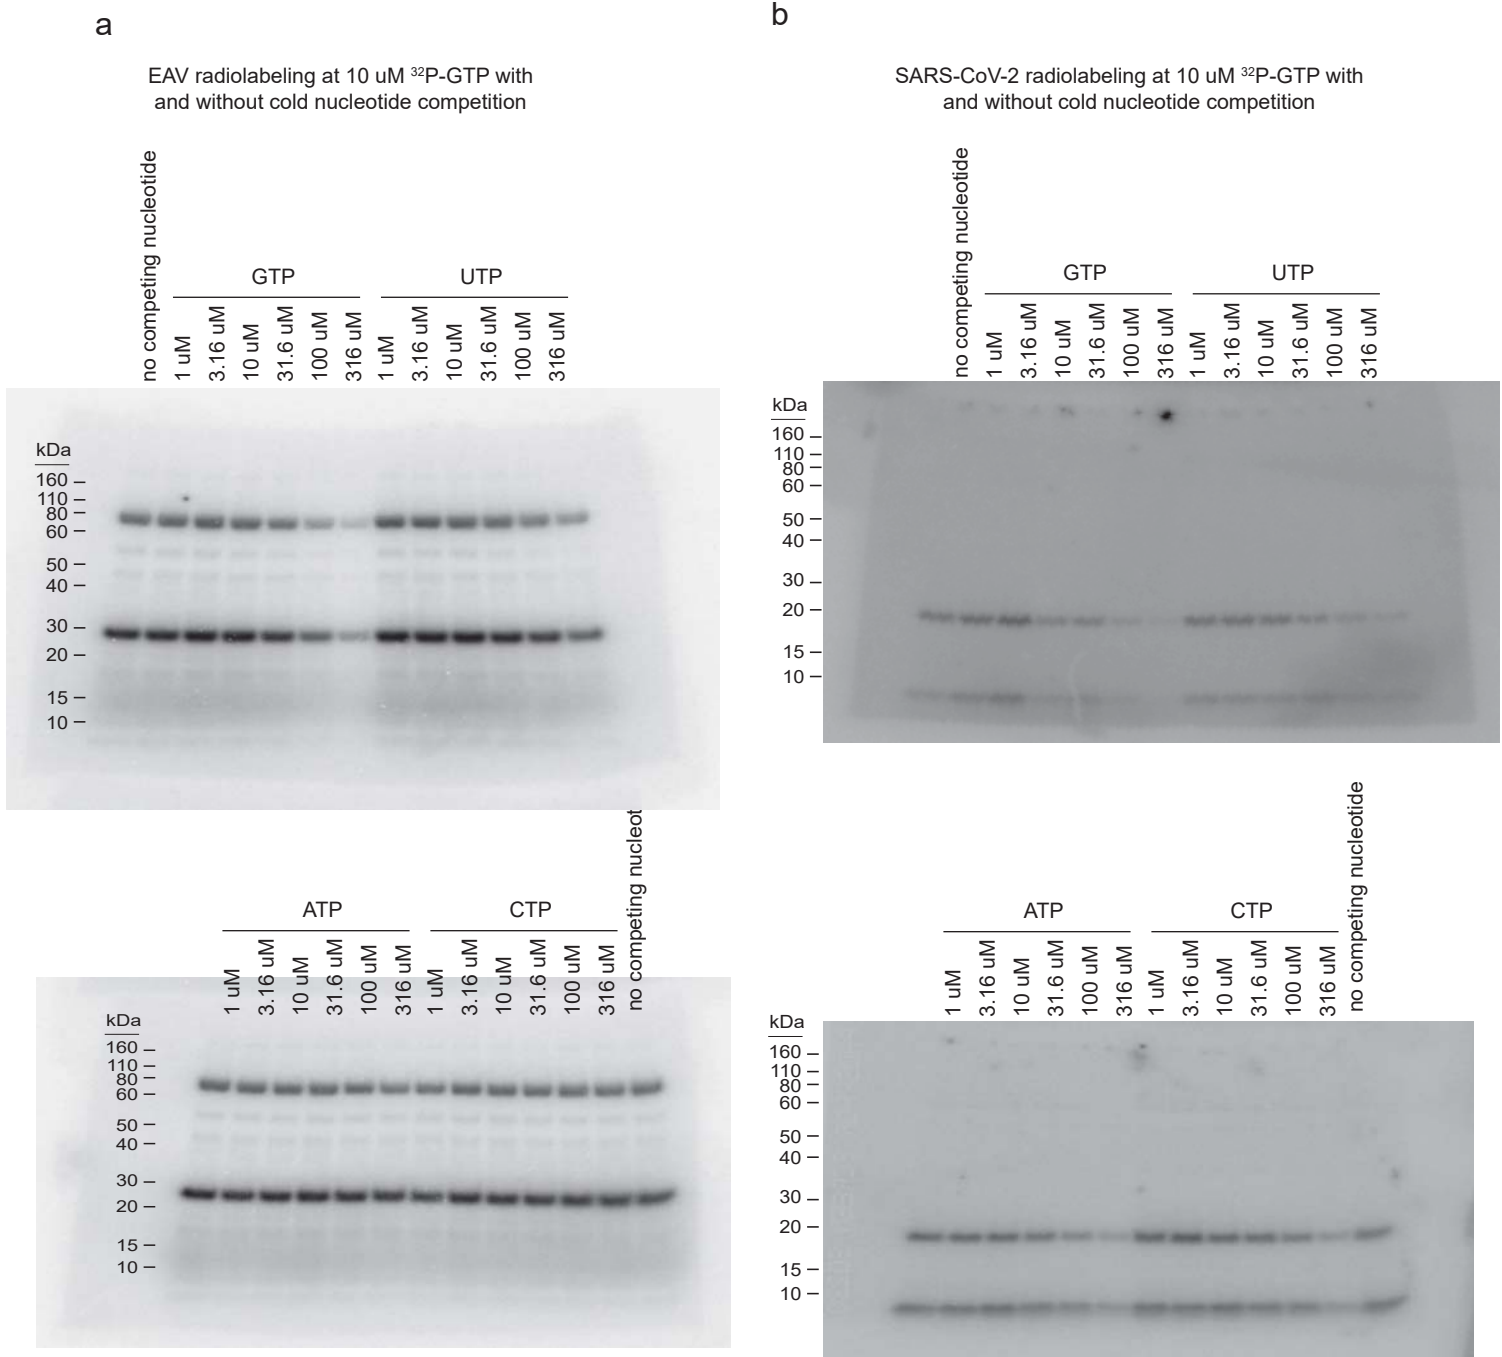

**Supplemental Figure 17. Competition of GTP radiolabeling with cold GTP, UTP, ATP or CTP.** Radiolabeling of EAV (a) or SARS-CoV-2 (b) proteins with  $\alpha$ - $^{32}\text{P}$ -GTP was competed against 1  $\mu\text{M}$  to 316  $\mu\text{M}$  cold nucleotide (GTP, UTP, ATP or CTP). Radioactive GTP concentrations (10  $\mu\text{M}$ ) were in excess of protein concentrations (0.6 to 2.7  $\mu\text{M}$ ). Labeled proteins were analyzed with SDS-PAGE followed by autoradiography. Uncropped gels are shown.



|                     |             |                    |              |
|---------------------|-------------|--------------------|--------------|
|                     | ↓           |                    |              |
| ref YP_005352880.1  | AISTVQNRVLD | AKATAVIVANLLEKAGV  | TNKHVVCCKIVK |
| ref YP_002308505.1  | AISTVQNKIL  | DAKATAVVANLLEKAGV  | TNKHAIKCKIVK |
| ref YP_002308478.1  | AVSTVQNKLL  | DAKAAA>VVANLLDKAGV | TNKHAVCCKIVK |
| ref YP_005352845.1  | AVSTVQNKIL  | DAKATAVVANLLEKAGV  | TNKHAVCCKIVK |
| ref YP_009019180.1  | KIASVQSKL   | TDMKCTNVVLLG       | LLSKMHVEANSK |
| gb ACT10947.1       | KISTVQSKL   | TEMKCTNVVLLG       | LLSKMHVESNSK |
| ref YP_001718603.1  | KISTVQSKL   | TDIKCTNVVLMG       | CLSSMNIANSK  |
| ref YP_001718610.1  | KISTVQSKL   | TEIKCTNVVLMG       | CLSSMNIANSK  |
| ref YP_008439200.1  | KISTVQSKL   | TDVKTNVVLMG        | CLSSMNIQANS  |
| gb AFU92112.1       | KVSSVQSKL   | TDIKCTNVVLLG       | CLSSMNIANTK  |
| gb AGK89913.1       | KISSVQSKL   | TDIKCSNVVLLG       | CLSSMNVNSAN  |
| ref YP_001351683.1  | KISSVQSKL   | TDLKTNVVLLG        | CLSSMNIANSR  |
| ref YP_001552234.1  | KVSTVQSKL   | TDLKCANVLLG        | CLTNMNIANSR  |
| ref YP_003766.2     | KISTVQSKL   | TDLKTNVVLLG        | CLSSMNIANS   |
| gb AFI49429.1       | KVSTVQSKL   | TDLKTNVVLLM        | GLLSNMNIANS  |
| gb AAF19383.1       | EVSQIQSRL   | TDVCKVNVVLLN       | CLQLHLHIASS  |
| gb AA76519.1        | EVSQIQSRL   | TDVCKANVVLLN       | CLQLHLHVANS  |
| gb AFE48810.1       | EVSQIQSRL   | TDVCKANVVLLN       | CLQLHLHVANS  |
| gb AGK85497.1       | PISTVQSKL   | SDVECTTVVLMQ       | LLTLKNVEANS  |
| gb AHB63480.1       | TVSTVQSKL   | TDVCKATVVMQ        | LLTLKNVEANS  |
| gb ABG47051.1       | KVATVQSKL   | TDLKTNSVLLT        | VLVQLLHLESNS |
| ref YP_009513008.1  | KIASVQSKL   | TDLKTNSVLLS        | VLVQLLHLEANS |
| ref YP_009047202.1  | KVAAMQSKL   | TDLKTNSVLLS        | VLVQLLHLEANS |
| gb ABN10874.1       | KIASVQSKL   | TDLKTNSVLLS        | VLVQLLHLEANS |
| gb ADM33581.1       | KVSTVQSKL   | TDLKTNSVLLS        | VLVQLLHLEANS |
| gb AAP50483.1       | KVATVQSKM   | SDVKCTNSVLLS       | VLVQLLHLEANS |
| lcl SARS-CoV-2 nsp7 | -----       | SKMSDVKCTNSV       | LLSVLQQLRVES |
| ref YP_009724389.1  | KVATVQSKM   | SDVKCTNSVLLS       | VLVQLLHLEANS |
|                     | .. : : . *  | :: *               | : . *        |
|                     | ↑           |                    |              |
|                     | lys-2       |                    |              |
| ref YP_005352880.1  | LLAHIIEFLP  | SEQVDEYLSM         | VNKPRVLDEY   |
| ref YP_002308505.1  | LLAHIVEFLP  | TDQVDAYLADE        | EEEAHQVNNY   |
| ref YP_002308478.1  | LLTHIEFLP   | TDQVDAYLADT        | VKVKALNTY    |
| ref YP_005352845.1  | LLAHIIEFLP  | TDQVDAYLADA        | AKAQHVNTY    |
| ref YP_009019180.1  | LLAFFLSKH   | NDCD-----          | LSELIDSYFDN  |
| gb ACT10947.1       | LIAFFLSKH   | NCTD-----          | LSDLIDSYFEN  |
| ref YP_001718603.1  | LVTFFISEH   | ADFN-----          | VSELVDSYFG   |
| ref YP_001718610.1  | LLTFFLSRQ   | KDFN-----          | CTELIDSYFAD  |
| ref YP_008439200.1  | LLAFFLSK    | NSAFG-----         | LDDLIDSYFD   |
| gb AFU92112.1       | LLAFFLSK    | HKHDFG-----        | FDDLIDSYFAD  |
| gb AGK89913.1       | LLAFFLSK    | NSAFG-----         | LDDLIDSYFD   |
| ref YP_001351683.1  | LLAFFLSK    | NSAFG-----         | VDELLIDSYF   |
| ref YP_001552234.1  | LVAFFLSK    | QQNFG-----         | VDDLIDSYFF   |
| ref YP_003766.2     | LLAFFLSK    | HSDFG-----         | LDLIDSYFDN   |
| gb AFI49429.1       | LLAFFLSK    | HSDFG-----         | LGDLVDSYF    |
| gb AAF19383.1       | LLVVLVFAN   | PAAVD-----         | SKCLASIEE    |
| gb AA76519.1        | LLIVLVFAN   | PAAVD-----         | TKCLASIDE    |
| gb AFE48810.1       | LLIVLVFAN   | PAAVD-----         | CLLSSIEE     |
| gb AGK85497.1       | MLVTLFCI    | DSTID-----         | LSEYCDLIL    |
| gb AHB63480.1       | MLMTLLS     | IDSTLD-----        | VKALCDELL    |
| gb ABG47051.1       | LFATLMSF    | SANVD-----         | LDALANDLF    |
| ref YP_009513008.1  | LLATLMSF    | SGSVD-----         | LEALASELL    |
| ref YP_009047202.1  | LFATLMTF    | SFNVD-----         | LDALASDI     |
| gb ABN10874.1       | LFATLMSF    | SANVD-----         | LEALASDLL    |
| gb ADM33581.1       | LLSVLLSL    | PLGAIN-----        | LDELCSILE    |
| gb AAP50483.1       | LLSVLLSM    | QGAVD-----         | INRLCEEM     |
| lcl SARS-CoV-2 nsp7 | LLSVLLSM    | QGAVD-----         | INKLCEEM     |
| ref YP_009724389.1  | LLSVLLSM    | QGAVD-----         | INKLCEEM     |
|                     | .. : : . *  | :: *               | : . *        |

**Supplementary Figure 18. Multiple sequence alignment of SARS-CoV-2 nsp7.** Within nidoviruses, SARS-CoV-2 nsp7 aligns only with other coronavirus polyproteins, where lys-2 is conserved, except in the common moorhen coronavirus HKU21 (YP\_005352880.1), murine hepatitis virus strain 2 (AAF19383.1) and Bat coronavirus HKU9-10-2 (ADM33581.1). In these strains, an arginine or asparagine are found instead of a lysine. The SARS-CoV-2 nsp7 and polyprotein 1ab sequences (YP\_009724389) are both included as separate entries in the alignment. “\*” indicates complete conservation, “:” indicates strong conservation, and “.” indicates weaker conservation per the Clustal Omega algorithm.

↓

|                  |                                                              |      |
|------------------|--------------------------------------------------------------|------|
| YP_001661452.1   | SLSDNTSFITAQIEHIKHHFVSWLFEVPIKISIQPVDKALRSIFIGPAMNDVYRCFN    | 4705 |
| YP_009666324.1   | SLSDYTSFIRSQIEHIKHHFVSWLFEVPIKISIQPVDKALRSIFIGPAMNDVYRCFN    | 4717 |
| YP_008798230.1   | RA-LGPNIMKLFYEAQKAPLPFCTKIITKFPALSAKARA-RTVSSCSFIASTIFRFAHKP | 4912 |
| YP_337905.2      | RA-LGPNITKLFYEAQKAPLPFCTKIITKFPALSAKARA-RTVSSCSFIASTIFRFAHKP | 4940 |
| ABI97394.1       | NA-LPEDFSPRLDDTASKTVMPPSTNIVKKFQRQKTRV-RTLGGSSFITSSIFRMLHKP  | 5048 |
| YP_009505581.1   | NA-LPEDFSDRLDDTASRTIMPFSTKIVTKHQRKTKPRV-RTIGGSSFITSSIFRMLHKP | 5353 |
| YP_007697636.1   | RT-LYGEYRDKLVYHKRHSADQALTLVINKVAISTKHRD-RTILAININKSEAGRSLFRW | 3157 |
| YP_007697642.1   | RQ-LYGSARDLKVYHKRHSADQMLTLVINKVANSTKHRD-RTILAININKSEGRALYRW  | 3184 |
| YP_009026378.1   | RE-LLGKYRDAIVYHKRHSADQQLTLTINKVAPSKNHRD-RTILAIKINKSEPGRSLYRW | 3163 |
| AEH26445.1       | RE-LYGNRYDAIVYHKRHSADQQLTLTINKVAPSKNHRD-RTILAIKINKSEPGRSLYRW | 3183 |
| YP_007697629.1   | RE-LLGDYRDAIVVHKRHSADQHLTLTINKVATSTKHRD-RTILAIKINKSEAGRSLYRW | 3187 |
| EAV_nsp9         | ---QSYCLIDDMVVSQSMKSNLQATMATCKRQYCSKYKI-RSILGTNNYIGLGLRACL   | 409  |
| ABI64079.1       | ---QSYCLIDDMVVSQSMKSNLQATMATCKRQYCSKYKI-RSILGTNNYIGLGLRACL   | 359  |
| AEC48047.1       | ---QSPININSICQAVSEVWQVTPVTLKQYCSKPKT-RTILGTNGLISLGLRALL      | 358  |
| YP_009109556.3   | ---QALPDIIDELCEKAIAEVWQVTPVTLKQYCSKAKT-RTILGTNMAASLALRALL    | 2461 |
| AZT89154.1       | ---QALPDIIDELCEKAIAEVWQVTPVTLKQYCSKAKT-RTILGTNMAASLALRALL    | 2461 |
| AGA19090.1       | ---QALPDINEICDRAAEVWQVTPVTLKQYCSKPKT-RTILGTNALSILALRAGL      | 359  |
| AAA74104.1       | ---QSHPDIDALCERACKEHWQVTPCTLKKQYCSKAKT-RTILGTNNFVALGLRSAL    | 355  |
| AAA85664.1       | ---QSHPDIDALCKRACEEHWQVTPCTLKKQYCSKSKT-RTILGTNNFVALGLRSAL    | 354  |
| A EJ54658.1      | ---QSIPEIDVLCARAVKENWQVTPCTLKKQYCSKPKT-RTILGTNNFIALAHRAL     | 361  |
| QFK93580.1       | ---QSVPEIDVLCQAQAVRENWQVTPCTLKKQYCSGKKKT-RTILGTNNFVALAHRAL   | 2728 |
| ANT45956.1       | ---QSVPEIDVLCQAQAVRENWQVTPCTLKKQYCSGKKKT-RTILGTNNFVALAHRAL   | 2728 |
| ALL55209.1       | ---QSIPEIDVLCQAQAVRENWQVTPCTLKKQYCSGKKKT-RTILGTNNFVALAHRAL   | 2759 |
| AFU51031.1       | ---QSVPEIDVLCQAQAVRENWQVTPCTLKKQYCSGKKKT-RTILGTNNFIALAHRAL   | 2678 |
| AFP43966.1       | ---QSVPEIDVLCQAQAVRENWQVTPCTLKKQYCSGKKKT-RTILGTNNFIALAHRAL   | 2859 |
| YP_005352880.1   | YD-MSYAEQNQLFEYTKRNVLPPTLTMNLKYAISAKDRA-RTVAGVSIIVSTMTNRQYHQ | 4095 |
| YP_002308505.1   | YD-MTYVEQNQLFEYTKRNVLPPTLTMNLKYAISAKDRA-RTVAGVSIIVSTMTNRQYHQ | 4233 |
| YP_005352845.1   | YD-MTHAEQNQLFEYTKRNVLPPTLTMNLKYAISAKDRA-RTVAGVSIIVSTMTNRQYHQ | 4202 |
| YP_002308478.1   | YD-MTYAEQNQLFEYTKRNVLPPTLTMNLKYAISAKDRA-RTVAGVSIIVSTMTNRQYHQ | 4149 |
| ABG47051.1       | YESMSYEQDELFAVTKRNVLPPTITQMNLYAISAKNRA-RTVAGVSIIVSTMTNRQYHQ  | 5003 |
| YP_009513008.1   | YESMSYEQDELFAVTKRNVLPPTITQMNLYAISAKNRA-RTVAGVSIIVSTMTNRQYHQ  | 5016 |
| ABN10874.1       | YESLSYEQDELFAVTKRNVLPPTITQMNLYAISAKNRA-RTVAGVSIIVSTMTNRQYHQ  | 5043 |
| YP_009047202.1   | YESMSYEQDELFAVTKRNVLPPTITQMNLYAISAKNRA-RTVAGVSIIVSTMTNRQYHQ  | 4952 |
| AAAX76519.1      | YEALSFEEQNEIYAYTKRNVLPPTLTMNLKYAISAKNRA-RTVAGVSIIVSTMTGRMPHQ | 4997 |
| A FE48810.1      | YEALSFEEQDDIYAYTKRNVLPPTLTMNLKYAISAKNRA-RTVAGVSIIVSTMTGRMPHQ | 4999 |
| AAF19384.1       | YEALSFEEQDEYVAYTKRNVLPPTLTMNLKYAISAKNRA-RTVAGVSIIVSTMTGRMPHQ | 581  |
| YP_009019180.1   | YETLSYEEQDELFAVTKRNVLPPTITQMNLYAISGKARA-RTVGGVSLSTMTTRQYHQ   | 4570 |
| ACT10947.1       | YETLSYEEQDALFALTKRNVLPPTITQMNLYAISGKARA-RTVGGVSLSTMTTRQYHQ   | 4581 |
| YP_001718610.1   | YESLSYEEQDALYALTKRNVLPPTITQMNLYAISGKARA-RTVGGVSLSTMTTRQYHQ   | 4783 |
| YP_001718603.1   | YEALSYEEQDALYAVTKRNVLPPTITQMNLYAISGKARA-RTVGGVSLSTMTTRQYHQ   | 4820 |
| YP_008439200.1   | YESLSYEEQDELYALTKRNVLPPTITQMNLYAISGKARA-RTVGGVALLSTMTTRQYHQ  | 4712 |
| AFU92112.1       | YESLSYEEQDALYAVTKRNVLPPTITQMNLYAISGKARA-RTVGGVSLSTMTTRQYHQ   | 4667 |
| YP_001351683.1   | YDLSYEEQDDLYAYTKRNVLPPTITQMNLYAISGKARA-RTVGGVSLSTMTTRQYHQ    | 4680 |
| AGK89913.1       | YESLSYEEQDELYAYTKRNVLPPTITQMNLYAISGKARA-RTVGGVSLSTMTTRQYHQ   | 4669 |
| YP_003766.2      | YESLSYEEQDALFALTKRNVLPPTITQMNLYAISGKARA-RTVGGVSLSTMTTRQYHQ   | 4612 |
| AFI49429.1       | YESLSYEEQDAMFALTKRNVLPPTITQMNLYAISGKARA-RTVGGVSLSTMTTRQYHQ   | 4641 |
| YP_001552234.1   | YETFSYEEQDALYAMTKRNVLPPTITQMNLYAISGKARA-RTVGGVSLSTMTTRQYHQ   | 4611 |
| AGK85497.1       | YE-MSLEEQDQLFESTKKNVLPPTITQMNLYAISAKNRA-RTVAGVSIIVSTMTNRQFNQ | 4508 |
| AHB63480.1       | YESLSYAEQDQLFELTKRNVLPPTITQMNLYAISAKSRA-RTVAGVSIIVSTMTNRQFNQ | 4515 |
| ADM33581.1       | YESLSYADQDELFAVTKRNVLPPTITQMNLYAISAKNRA-RTVAGVSIIVSTMTNRQFNQ | 4782 |
| AAP50483.1       | YDMSYEDQDALFAYTKRNVLPPTITQMNLYAISAKNRA-RTVAGVSIIVSTMTNRQFNQ  | 4943 |
| SARS-CoV-2_nsp12 | YDMSYEDQDALFAYTKRNVLPPTITQMNLYAISAKNRA-RTVAGVSIIVSTMTNRQFNQ  | 574  |
| YP_009724389.1   | YDMSYEDQDALFAYTKRNVLPPTITQMNLYAISAKNRA-RTVAGVSIIVSTMTNRQFNQ  | 4966 |

\*  
↑

|                  |                                                               |      |
|------------------|---------------------------------------------------------------|------|
| YP_001661452.1   | WLE-FTKT-RLSYNTVLIGFKDTHCGINKLINGI-KAGF---NP--KGKSKWISQDYPKF  | 4757 |
| YP_009666324.1   | WLE-FTKT-RLSYNTVLIGFKDTHCGINKLINGI-TAGF---NP--KGKAKWISQDYPKF  | 4769 |
| YP_008798230.1   | VTSKMVEAQNNSQGFCLIGVSKYGLKFKSKFLKDK-YGSI-----EQFDVFGSDYTKC    | 4963 |
| YP_337905.2      | VTSKMVEAQNNSQGFCLIGVSKYGLKFKSKFLKDK-YGAI-----EQFDVFGSDYTKC    | 4991 |
| ABI97394.1       | VTNKMQVTAQANIGPFLIGISKFNGLGFHKYLSAHHPNGI-----EDCQVMGADYTKC    | 5100 |
| YP_009505581.1   | VTNKMQVTAQANIGPFLIGVSKFNGLGFHKYLSAHHPNGI-----EDCSVMGADYTKC    | 5405 |
| YP_007697636.1   | FLDKIKDT-ANKGGPILIGLIAQYGGWDKLYKNL-YKDSPI-DNPDATEHVVLGGKDYPKW | 3215 |
| YP_007697642.1   | HLDKIKYT-ANNGGPILIGLIAQYGGWDKFYKQL-YKNSPDPETAQYAVLGGKDYPKW    | 3242 |
| YP_009026378.1   | NLDKIKYT-ASLGGPILIGFTAQYGGWDKFYKQL-YKNSPADQPDIAEYAVLGGKDYPKW  | 3221 |
| AEH26445.1       | NLDKIKYT-SSLGGPILIGFTAQYGGWDKLYKYL-YKNSPADHPDIAEYAVLGGKDYPKW  | 3241 |
| YP_007697629.1   | NLDKIKYT-ASLGGPILIGFTAQYGGWDKFYKQL-YKNSPADQPGVAERAVLGGKDYPKW  | 3245 |
| EAV_nsp9         | VTAAFQKA-GKDGSPILYLGKSKFDDI-----PAP-----DK-YCLETDLASC         | 449  |
| ABI64079.1       | VTAAFQKA-GKDGSPILYLGKSKFDDI-----PAP-----DK-YCLETDLASC         | 399  |
| AEC48047.1       | VTARFQLA-GK-DSPICLGKSKFQRS-----DIRI-----TT-RCLETDLASC         | 398  |
| YP_009109556.3   | VTQGFQLA-GK-NSPICLGKSKFDPC-----TFEV-----KG-RCLETDLASC         | 2501 |
| AZT89154.1       | VTQGFQLA-GK-NSPICLGKSKFDPC-----TFEV-----KG-RCLETDLASC         | 2501 |
| AGA19090.1       | VTQAFQLA-GK-DTPICLGKSKYNEFM-----QYVP-----QG-VCMETDLASC        | 399  |
| AAA74104.1       | VTQGFMRK-GI-GSPICLGKSKFTPL-----PTKV-----SG-RCLEADLASC         | 395  |
| AAA85664.1       | VTQGFMRK-GI-GTPICLGKSKFTPL-----PVRI-----GG-RCLEADLASC         | 394  |
| AEJ54658.1       | VTQAFMRK-AW-KSPIALGKSKFKEL-----HCTV-----AG-RCLEADLASC         | 401  |
| QPK93580.1       | VTQGFMRK-AF-NSPIALGKSKFKEL-----QTPV-----LG-RCLEADLASC         | 2768 |
| ANT45956.1       | VTLGFMRK-AF-NSPIALGKSKFKEL-----QTPV-----LG-RCLEADLASC         | 2768 |
| ALL55209.1       | VTQGFMRK-AF-NSPIALGKSKFKEL-----QTPV-----LG-RCLEADLASC         | 2799 |
| APU51031.1       | VTQGFMRK-AF-NSPIALGKSKFKEL-----QTPV-----LG-RCLEADLASC         | 2718 |
| AFP43966.1       | VTQGFMRK-AF-NSPIALGKSKFKEL-----QTPV-----LG-RCLEADLASC         | 2899 |
| YP_005352880.1   | ILK-S-IS-LARNQTIIVIGTKFYGGWDDNMLRKL-MNGI-----KNPTLAGWDYPKC    | 4143 |
| YP_002308505.1   | MLK-S-IS-LARNQTIIVIGTKFYGGWDDNMLRRL-MHNI-----NNPILVGDWYPKC    | 4281 |
| YP_005352845.1   | MLK-X-IS-LARNQTIIVIGTKFYGGWDDNMLRRL-MCNI-----NNPILVGDWYPKC    | 4250 |
| YP_002308478.1   | MLK-S-IS-LARNQTIIVIGTKFYGGWDDNMLRRL-MNGI-----NNPILVGDWYPKC    | 4197 |
| ABG47051.1       | MLK-S-MA-ATRGATCVIGTKFYGGWDFMLKTL-YKDV-----ESPHLMGWDPK        | 5051 |
| YP_009513008.1   | MLK-S-MA-ATRGATCVIGTKFYGGWDFMLKTL-YKDV-----DNPFLMGWDPK        | 5064 |
| ABN10874.1       | MLK-S-MA-ATRGATCVIGTKFYGGWDFMLKTL-YKDV-----DNPFLMGWDPK        | 5091 |
| YP_009047202.1   | MLK-S-MA-ATRGATCVIGTKFYGGWDFMLKTL-YKDV-----DNPFLMGWDPK        | 5000 |
| AAK76519.1       | CLK-S-IA-ATRGVPPVIGTKFYGGWDDMLRHL-IKDV-----DNPVLMGWDPK        | 5045 |
| AFE48810.1       | CLK-S-IA-ATRGVPPVIGTKFYGGWDDMLRRL-IKDV-----DNPVLMGWDPK        | 5047 |
| AAF19384.1       | CLK-S-IA-ATRGVPPVIGTKFYGGWDDMLRRL-IKDV-----DSPVLMGWDPK        | 629  |
| YP_009019180.1   | HLK-S-IA-ATRNATVVIGTKFYGGWDDMLKLN-MRDV-----DNGCLMGWDPK        | 4618 |
| ACT10947.1       | HLK-S-IA-ATRNATVVIGTKFYGGWDDNMLKLN-MRDV-----DNGCLMGWDPK       | 4629 |
| YP_001718610.1   | HLK-S-IV-NTRNATVVIGTKFYGGWDDNMLRNL-MDGV-----DNACLMGWDPK       | 4831 |
| YP_001718603.1   | HLK-S-IV-NTRNATVVIGTKFYGGWDDNMLRNL-IDGV-----DNACLMGWDPK       | 4868 |
| YP_008439200.1   | HLK-S-IV-NTRGASVVIGTKFYGGWDDAMLKTL-IHGV-----ENPFLMGWDPK       | 4760 |
| AFU92112.1       | HLK-S-IV-NTRNASVVIGTKFYGGWDDNMLNTL-INGV-----ENPCLMGWDPK       | 4715 |
| YP_001351683.1   | HLK-S-IV-NTRGASVVIGTKFYGGWDDNMLKTL-IKDV-----ENPFLMGWDPK       | 4728 |
| AGK89913.1       | HLK-S-IV-NTRGASVVIGTKFYGGWDDNMLKLN-IDGV-----ENPCLMGWDPK       | 4717 |
| YP_003766.2      | HLK-S-IV-NTRNATVVIGTKFYGGWDDNMLRNL-IDGV-----ENPMLMGWDPK       | 4660 |
| AFI49429.1       | CLK-S-IV-ATRNATVVIGTKFYGGWDDNMLKLN-IADV-----DDPKLMGWDPK       | 4689 |
| YP_001552234.1   | HLK-S-IV-NTRNAPVVIGTKFYGGWDDNMLKLN-MNDV-----DNGALMGWDPK       | 4659 |
| AGK85497.1       | ILK-S-IV-NTRNAPVVIGTKFYGGWDDNMLRNL-IQGV-----EDPILMGWDPK       | 4556 |
| AHB63480.1       | CLK-S-IV-NTRNATVVIGTKFYGGWDDNMLRNL-MRGV-----EDPVLMGWDPK       | 4563 |
| ADM33581.1       | MLK-S-IA-AARGASVVIGTKFYGGWDDNMLRNL-CEGV-----DNPFLMGWDPK       | 4830 |
| AAP50483.1       | LLK-S-IA-ATRGATVVIGTSKFYGGWDDNMLKTV-YSDV-----ETPFLMGWDPK      | 4991 |
| SARS-CoV-2_nsp12 | LLK-S-IA-ATRGATVVIGTSKFYGGWDDNMLKTV-YSDV-----ENPFLMGWDPK      | 622  |
| YP_009724389.1   | LLK-S-IA-ATRGATVVIGTSKFYGGWDDNMLKTV-YSDV-----ENPFLMGWDPK      | 5014 |

.\*

\*.

|                  |                                                               |      |
|------------------|---------------------------------------------------------------|------|
| YP_001661452.1   | DTCVDTMAQYSYIVNH-AHYHT-----HTNLSLIVRGLCOLIANSTSPFIYYNSILIR    | 4809 |
| YP_009666324.1   | DTCVDTMAQYSYIMNH-AHYHT-----HTNLSLITRGLCOLIANSTSPFIYYNSMLIR    | 4821 |
| YP_008798230.1   | DRTFPLSFRALTAALLYELG-----GWEE-ESWLYLNEVNSYMLDTMICDGMLLN       | 5012 |
| YP_337905.2      | DRTFPLSFRALTAALLYELG-----GWEE-DSWLYLNEVNSYMLDTMLCDGMLLN       | 5040 |
| ABI97394.1       | DRSPFVVCRALSAALFYELG-----HLEP-NNHWFLNEMFALLDPSFISGHIFN        | 5149 |
| YP_009505581.1   | DRSPFVVCRALSAALFYDLG-----NLPH-KSHWFINECFAFIFDQSYIAGHVFN       | 5454 |
| YP_007697636.1   | DRRISNMLQLTTTNVFNLDQNTQFKNNQASPSSETWHEYMAETTQVLPDYLVFVFNELVQ  | 3275 |
| YP_007697642.1   | DRRISNMLQLTTTNVFLSLIDQTTQLRRNNANPAETWHEYMAETTQVLPDYLVFVFNELHQ | 3302 |
| YP_009026378.1   | DRRISNMLQLTTTTLVYSLIDPNTQTKLNNATPSQTWHEYMAETTQVLPDYLVFVFNELVQ | 3281 |
| AEH26445.1       | DRRISNMLQLTTTTLVYSLIDPNTQSKLNNATPAQTWHEYMAETTQVLPDYLVFVFNELVQ | 3301 |
| YP_007697629.1   | DRRISNMLQLTTTTLVYSLIDPNTQKLNANPAQTWHEYMAETTQVLPDYLVFVFNELVQ   | 3305 |
| EAV_nsp9         | DRSTPALVRWFATNLI FEL--A-----GQPELVHSYVL-NCCH---DLVVAGSVAFT    | 495  |
| ABI64079.1       | DRSTPALVRWFATNLI FEL--A-----GQPELVHSYVL-NCCH---DLVVAGSVAFT    | 445  |
| AEC48047.1       | DRSTPALVRYFSTRLLFEM--A-----CAERAIPLYVA-NCCH---DLLVTQTSAVT     | 444  |
| YP_009109556.3   | DRSTPALVRFHATKLLFEM--A-----CAERALPLYVV-NCCH---DLIVTQTSAAAT    | 2547 |
| AZT89154.1       | DRSTPALVRHFATKLLFEM--A-----CAERALPLYVV-NCCH---DLIVTQTSAAAT    | 2547 |
| AGA19090.1       | DRSTPAVVRWFATELLFEL--G-----CSSHLKPLYIA-NCCH---DLLVTQTACT      | 445  |
| AAA74104.1       | DRSTPAIIRWFTTNLLFEL--A-----GPEEWIPSYVL-NCCH---DAVSTMSCGCFD    | 441  |
| AAA85664.1       | DRSTPAIIRWFTTNLLFEL--A-----GAEEWIPSYVL-NCCH---DVVSTMSCGCFD    | 440  |
| AEJ54658.1       | DRSTPAIVRWFVANLLYEL--A-----GCEEYLPYVVL-NCCH---DLVATQDGAVT     | 447  |
| QPK93580.1       | DRSTPAIVRWFVAHLLYEL--A-----CAEDHLPYVVL-NCCH---DLLVTQSGAVT     | 2814 |
| ANT45956.1       | DRSTPAIVRWFVAHLLYEL--A-----CAEDHLPYVVL-NCCH---DLLVTQSGAVT     | 2814 |
| ALL55209.1       | DRSTPAIVRWFVAHLLYEL--A-----CAEEHLPYVVL-NCCH---DLLVTQSGAVT     | 2845 |
| APU51031.1       | DRSTPAIVRWFVAANLLYEL--A-----CAEEHLPYVVL-NCCH---DLLVTQSGAVT    | 2764 |
| AFP43966.1       | DRSTPAIVRWFVAANLLYEL--A-----CAEEYLPYVVL-NCCH---DLLVTQSGAVT    | 2945 |
| YP_005352880.1   | DRSMPNLIIRIAASCLLARKH-T-----CCNQSQRFYRLANECCQVLEVVVSGNNLYV    | 4195 |
| YP_002308505.1   | DRSMPNLIIRIAASCLLARKH-T-----CCNQSQRFYRLANECCQVLEVVVSGNNLYV    | 4333 |
| YP_005352845.1   | DRSMPNMLR IAASCLLARKH-T-----CCNQSQRFYRLANECCQVLEVVVSGNNLYV    | 4302 |
| YP_002308478.1   | DRSMPNMLR IAASCLLARKH-T-----CCNQSQRFYRLANECCQVLEVVVSGNNLYV    | 4249 |
| ABG47051.1       | DRAMPNMCRIASLILARKHST-----CCTNSDRFYRLANECAQVLEVVVSGGGYV       | 5104 |
| YP_009513008.1   | DRAMPNMCRIASLILARKHST-----CCTNSDRFYRLANECAQVLEVVVSGGGYV       | 5117 |
| ABN10874.1       | DRAMPNMCRIASLILARKHST-----CCTNDRFYRLANECAQVLEVVVSGGGYV        | 5144 |
| YP_009047202.1   | DRAMPNMCRIASLILARKHGT-----CCTTRDRFYRLANECAQVLEVVVSGGGYV       | 5053 |
| AAK76519.1       | DRAMPNILRIVSSLVLARKHEF-----CSSHGRDRFYRLANECAQVLEIVMCGGCYV     | 5098 |
| AFE48810.1       | DRAMPNILRIVSSLVLARKHDA-----CCTQSDRFYRLANECAQVLEIVMCGGCYV      | 5100 |
| AAF19384.1       | DRAMPNILRISSLVLARKHDS-----CSSHTDRFYRLANECAQVLEIVMCGGCYV       | 682  |
| YP_009019180.1   | DRALPNMIRMASAMILGSKHVG-----CCTHSDRFYRLSNELAQVLEVVHCTGGFYI     | 4671 |
| ACT10947.1       | DRALPNMIRMASAMILGSKHIG-----CCTHSDRFYRLSNELAQVLEVVHCTGGFYI     | 4682 |
| YP_001718610.1   | DRALPNMIRMISAMILGSKHVN-----CCTNSDRFYRLCNELAQVLEVVVSNNGGFYM    | 4884 |
| YP_001718603.1   | DRALPNMIRMISAMILGSKHEN-----CCTNSDRFYRLCNELAQVLEVVVSNNGGFYL    | 4921 |
| YP_008439200.1   | DRALPNMVRMISAMILGSKHVT-----CCTASDRFFRLANEQAQVLEVVVSNNGGFYL    | 4813 |
| AFU92112.1       | DRALPNMIRMISAMILGSKHTT-----CCTTDERYRLCNELAQVLEVVVSNNGGFY      | 4768 |
| YP_001351683.1   | DRALPNMIRMISAMILGSKHVN-----CCSSDRFYRLCNELAQVLEVVVSNNGGFYV     | 4781 |
| AGK89913.1       | DRALPNMIRMISAMILGSKHTT-----CCSSDRFFRLCNELAQVLEVVVSNNGGFYL     | 4770 |
| YP_003766.2      | DRALPNMIRMISAMVLGSKHVN-----CCTATDRFYRLGNELAQVLEVVVSNNGGFYF    | 4713 |
| AFI49429.1       | DRAMPSMIRMLSAMVLGSKHVT-----CCTASDRFYRLSNELAQVLEVVVSNNGGFYF    | 4742 |
| YP_001552234.1   | DRAMPSMIRMLAAMVLGSKHVT-----CCTSDRFYRLSNELAQVLEVVVSNNGGFYV     | 4712 |
| AGK85497.1       | DRAMPNLLR IAASLVLARKHTN-----CCTWSEYRILYRLNECAQVLESETVLTGGIYV  | 4609 |
| AHB63480.1       | DRAMPNLLR IAASLVLARKHKG-----CCDWNERIYRLNEAAQVLESEVALSNGGLYV   | 4616 |
| ADM33581.1       | DRAMPNLLRIFASLILARKHAT-----CCNASERFYRLANECAQVLESEMVLGCGGFYV   | 4883 |
| AAP50483.1       | DRAMPNMLRIMASLVLARKHNT-----CCNLSHRFYRLANECAQVLESEMVMCGGSLYV   | 5044 |
| SARS-CoV-2_nsp12 | DRAMPNMLRIMASLVLARKHTT-----CCSLSHRFYRLANECAQVLESEMVMCGGSLYV   | 675  |
| YP_009724389.1   | DRAMPNMLRIMASLVLARKHTT-----CCSLSHRFYRLANECAQVLESEMVMCGGSLYV   | 5067 |

\*

:

|                  |                                                                |      |
|------------------|----------------------------------------------------------------|------|
| YP_001661452.1   | KLHGVSSGDGATAIKNSHCNSVITNIAFYRQIVDNQV----PEEYRGLQSTLYTTLING    | 4864 |
| YP_009666324.1   | KLHGVSSGDGATAIKNSHCNSIITNIAFYRQIIDNQV----PEEYRGLQSTLYNTLING    | 4876 |
| YP_008798230.1   | KPGGTTSSGDATTASNTFYNYMVHYVVAFKTILS-DLTES----NRVM-RVAHNAAYTT    | 5065 |
| YP_337905.2      | KPGGTTSSGDATTASNTFYNYMVHYVVAFKTILS-DLSDC----NKVM-RIAHNAAYTT    | 5093 |
| ABI97394.1       | KPGGTTSSGDSTAFSNSFYNYFVHLYIQYLTFITTEMPPS----YQPL-CNLAHQAFST    | 5203 |
| YP_009505581.1   | KPGGTTSSGDSTAFSNSFYNYFVHLYIQYQTFLSADLPDS----LKPI-QALAHRAYTL    | 5508 |
| YP_007697636.1   | KPGGVTSGNSRTADGNSLHMLIDMYALIIQLIQSTPENVHIE--SKLRNTLCKTVFET     | 3332 |
| YP_007697642.1   | KPGGVTSGNSRTADGNSLHMLIDFYAIIQLIQSTPENVDLQ--SELRSLCKIVFTK       | 3359 |
| YP_009026378.1   | KPGGVTSGNSRTADGNSLHMLIDFYAIIQLIQSTPDNVHLE--PELRNKLCKTVFTR      | 3338 |
| AEH26445.1       | KPGGVTSGNSRTADGNSLHMLIDFYAIIISQLIQSTPENVHLE--VNLRNALCKTVFTK    | 3358 |
| YP_007697629.1   | KPGGVTSGNSRTADGNSLHMLIDFYAIIITQLIQSKPHNVHLH--SKLRNRLCKTVFTK    | 3362 |
| EAV_nsp9         | KRGLSSGDPITSISNTIYSLVLYTQHMLLCLGLEGY----FPEIAEKYLDGSLE-----    | 545  |
| ABI64079.1       | KRGLSSGDPITSISNTIYSLVLYTQHMLLCLGLEGY----FPEIAEKYLDGSLE-----    | 495  |
| AEC48047.1       | KRGLSSGDPITSISNTIYSLVLYTQHMLLCLGLEGY----FPEIAEKYLDGSLE-----    | 493  |
| YP_009109556.3   | KRGLSSGDPVTSIANTIYSLVLYVQHMLVTLLENG----H-PLSLKFLSGKLN-----     | 2596 |
| AZT89154.1       | KRGLSSGDPVTSIANTIYSLVLYVQHMLVTLLENG----H-PLSLKFLSGKLN-----     | 2596 |
| AGA19090.1       | KRGLSSGDPVTSISNTIYSLVLYTQHMLLCLGLEGY----H-KVALKYLEGRIT-----    | 494  |
| AAA74104.1       | KRGLSSGDPVTSISNTIYSLVLYVQHMLVSAFRGC----H-KVCGFLRDSLE-----      | 490  |
| AAA85664.1       | KRGLSSGDPVTSISNTIYSLVLYVQHMLVSAFRGC----H-KIGGLFLQDSLE-----     | 489  |
| AEJ54658.1       | KRGLSSGDPVTSISNTIYSLVLYVQHMLVSAKMG----H-EIGLKFLQEQLK-----      | 496  |
| QPK93580.1       | KRGLSSGDPITSISNTIYSLVLYVQHMLVSAFRGC----H-PHGLLFLQDQLK-----     | 2863 |
| ANT45956.1       | KRGLSSGDPITSISNTIYSLVLYVQHMLVSAFRGC----H-PHGLLFLQDQLK-----     | 2863 |
| ALL55209.1       | KRGLSSGDPITSISNTIYSLVLYVQHMLVSAFRGC----H-PHGLLFLQDQLK-----     | 2894 |
| APU51031.1       | KRGLSSGDPITSISNTIYSLVLYVQHMLVSAFRGC----H-PHGLLFLQDQLK-----     | 2813 |
| AFP43966.1       | KRGLSSGDPITSISNTIYSLVLYVQHMLVSAFRGC----H-PHGLLFLQDQLK-----     | 2994 |
| YP_005352880.1   | KPGGTTSSGDATTAYANSVFNILQVVTANVAAPLSTST-TTSHSLKEVADLHRNLYEDIYRG | 4254 |
| YP_002308505.1   | KPGGTTSSGDATTAYANSVFNILQVVSANVAAPLSTST-TTSHSNNDIACLHRALYEDIYRG | 4392 |
| YP_005352845.1   | KPGGTTSSGDATTAYANSVFNILQVVSANVAAPLSTST-TTTHLNKDIADLHRSLYEDIYRG | 4361 |
| YP_002308478.1   | KPGGTTSSGDATTAYANSVFNILQVVSANVATFLSTST-TSSHNSREIADLHRNLYEDIYRG | 4308 |
| ABG47051.1       | KPGGTTSSGDATTAYANSVFNILQAVTANVSALMSAN-GNTIIDREIKDMQFDLYINVYRK  | 5163 |
| YP_009513008.1   | KPGGTTSSGDATTAYANSVFNILQAVTANVSALMSAN-GNKIIDKEVKDMQFELYVNVYRN  | 5176 |
| ABN10874.1       | KPGGTTSSGDATTAYANSVFNILQAVTANVSALMGAN-GNTIIVDEEVKDMQFELYVNVYRK | 5203 |
| YP_009047202.1   | KPGGTTSSGDATTAYANSVFNILQAVTANVSALMGAN-GNKIIDKEVKDMQFDLYVNVYRS  | 5112 |
| AAK76519.1       | KPGGTTSSGDATTAFANSVFNILQAVTANVCSLMACN-GHKIEDLSIRNLQKRLYSNVYRT  | 5157 |
| AFE48810.1       | KPGGTTSSGDATTAFANSVFNILQAVTANVCSLMACN-GNKIEDLSIRALQKRLYSHVYRS  | 5159 |
| AAF19384.1       | KPGGTTSSGDATTAFANSVFNILQAVTANVCSLMACN-GHKIEDLSIRELQKRLYSNVYRA  | 741  |
| YP_009019180.1   | KPGGTTSSGDATTAYANSVFNILQAVTANVNRLLSVD-SNTCNVNVKALQRKIYDNCYRS   | 4730 |
| ACT10947.1       | KPGGTTSSGDATTAYANSVFNILQAVTANVNRLLSVD-SNTCNVNVKALQRKIYDNCYRS   | 4741 |
| YP_001718610.1   | KPGGTTSSGDATTAYANSVFNILQAVTANVNRLLSVD-SNTCNVNVKALQRKIYDNCYRS   | 4943 |
| YP_001718603.1   | KPGGTTSSGDATTAYANSVFNILQAVTANVNRLLSVD-SNTCNVNVKALQRKIYDNCYRT   | 4980 |
| YP_008439200.1   | KPGGTTSSGDATTAYANSVFNILQAVTANVNRLLSVD-SNLCNNLDVRDLQRRLYECYRS   | 4872 |
| AFU92112.1       | KPGGTTSSGDATTAYANSVFNILQAVTANVNRLLSVD-SNVCNNVSVKTLQRELYDNCYRS  | 4827 |
| YP_001351683.1   | KPGGTTSSGDATTAYANSVFNILQAVTANVNRLLSVD-SNTCNVNVKALQRKIYDNCYRS   | 4840 |
| AGK89913.1       | KPGGTTSSGDATTAYANSVFNILQAVTANVNRLLSVD-SNVCNNVSVKTLQRELYDNCYRS  | 4829 |
| YP_003766.2      | KPGGTTSSGDATTAYANSVFNILQAVTANVNRLLSVD-SNVCNNVNRDLQRRLYDNCYRL   | 4772 |
| AFI49429.1       | KPGGTTSSGDATTAYANSVFNILQAVTANVNRLLSVD-SNVCNNVNRDLQRRLYDNCYRN   | 4801 |
| YP_001552234.1   | KPGGTTSSGDATTAYANSVFNILQAVTANVNRLLSVD-SNVCNNVNRDLQRRLYDNCYRS   | 4771 |
| AGK85497.1       | KPGGTTSSGDATTAYANSVFNILQAVTANVNRLLSVD-SNVCNNVNRDLQRRLYDNCYRS   | 4668 |
| AHB63480.1       | KPGGTTSSGDATTAYANSVFNILQAVTANVNRLLSVD-SNVCNNVNRDLQRRLYDNCYRS   | 4675 |
| ADM33581.1       | KPGGTTSSGDATTAYANSVFNILQAVTANVNRLLSVD-SNVCNNVNRDLQRRLYDNCYRS   | 4942 |
| AAP50483.1       | KPGGTTSSGDATTAYANSVFNILQAVTANVNRLLSVD-SNVCNNVNRDLQRRLYDNCYRN   | 5103 |
| SARS-CoV-2_nsp12 | KPGGTTSSGDATTAYANSVFNILQAVTANVNRLLSVD-SNVCNNVNRDLQRRLYDNCYRN   | 734  |
| YP_009724389.1   | KPGGTTSSGDATTAYANSVFNILQAVTANVNRLLSVD-SNVCNNVNRDLQRRLYDNCYRN   | 5126 |

\* \* :\*: \* : \*

|                  |                                                            |      |
|------------------|------------------------------------------------------------|------|
| YP_001661452.1   | IHSK-----DDAYSTHRAFEWNI SRCATLSDDTLAI INPDVLD-----         | 4902 |
| YP_009666324.1   | IQSK-----DDAYSTHRAFEWNI SRCATLSDDTLAI INPDVFD-----         | 4914 |
| YP_008798230.1   | GNV--D-----VFNTLLEEQQTNYFLNFLSDDSFIFSEPGALKIFTC--EN        | 5108 |
| YP_337905.2      | GDY--G-----VFNTLLEEQQTNYFLNFLSDDSFIFSKPGALKIFTC--EN        | 5136 |
| ABI97394.1       | GNTETYD-----LYFSMADDLNSTYFLHFLSDDSFII SKPTAFPIFTF--AN      | 5249 |
| YP_009505581.1   | GEPDITYD-----LYFSQIDDLNSTQYFLHFLSDDSFII SKPEAFPIFTF--AN    | 5554 |
| YP_007697636.1   | IPSDYIDNTNVLNLRNTDILHRIRTR---IAKGAYLSDDGLLIDTRLVK-----     | 3379 |
| YP_007697642.1   | IPADYIDDLNTRDLVKTDVLRKIRLN---VAKGLYLSDDGLLVDPRIIR-----     | 3406 |
| YP_009026378.1   | IPSDYIDVSN-VTLRNTDVLRTIRLR---VAKGLYLSDDGLLVDPRIIR-----     | 3384 |
| AEH26445.1       | IPSDYIDSSC-VTLRNTDILHTIRRR---VAKGAYLSDDGLLVDPRIIR-----     | 3404 |
| YP_007697629.1   | IPADYINTSC-VTLRKTDTLRTIRLK---IAKNLVLSDDGLLVDPRIID-----     | 3408 |
| EAV_nsp9         | -----LRDMFK---YRVVYIYSDDVVL-----                           | 564  |
| ABI64079.1       | -----LRDMFK---YRVVYIYSDDVVL-----                           | 514  |
| AEC48047.1       | -----MEDLIK---VQRFVVSDDLVL-----                            | 512  |
| YP_009109556.3   | -----FQDLYK---LQAFIVYSDDLIL-----                           | 2615 |
| AZT89154.1       | -----FQDLYK---LQAFIVYSDDLIL-----                           | 2615 |
| AGA19090.1       | -----LEDLIA---VQPFVVSDDLVL-----                            | 513  |
| AAA74104.1       | -----MEQLFE---LQPLLVSDDVVL-----                            | 509  |
| AAA85664.1       | -----MEQLFE---LQPLLVSDDVVF-----                            | 508  |
| AEJ54658.1       | -----FEDLLE---IQPMLVYSDDLVL-----                           | 515  |
| QPK93580.1       | -----FEDMLK---VQPLIVYSDDLVL-----                           | 2882 |
| ANT45956.1       | -----LEDMLK---VQPLIVYSDDLVL-----                           | 2882 |
| ALL55209.1       | -----FEDMLK---VQPLIVYSDDLVL-----                           | 2913 |
| APU51031.1       | -----FEDMLK---VQPLIVYSDDLVL-----                           | 2832 |
| AFP43966.1       | -----FEDMLK---VQPLIVYSDDLVL-----                           | 3013 |
| YP_005352880.1   | DSNN---KTVID----NFYDHLAT---YFGLMILSDDGVACIDTEAAANGVVADLNG  | 4301 |
| YP_002308505.1   | DSSD---TAVIN----SFYHHLQT---YFGLMILSDDGVACIDSDAAKQGSVADLDG  | 4439 |
| YP_005352845.1   | DSND---ITVID----RFYQHLQS---YFGLMILSDDGVACIDSDVAKSGAVADLDG  | 4408 |
| YP_002308478.1   | DSNN---TTIID----QFYQHLQK---YFGLMILSDDGVACIDTEAAASGVVSNLDG  | 4355 |
| ABG47051.1       | VVPD---PKFVD----KYAFLNK---HFSMMILSDDGVVVCYNSDYAAKGVVASIQN  | 5210 |
| YP_009513008.1   | SKPD---PKFVD----KYAFLNR---HFSMMILSDDGVVVCYNKDYAARGYIAGIQN  | 5223 |
| ABN10874.1       | SQPD---PKFVD----RYAFLNK---HFSMMILSDDGVVVCYNSDYATKGYIASIQN  | 5250 |
| YP_009047202.1   | TSFD---PKFVD----KYAFLNK---HFSMMILSDDGVVVCYNSDYAAKGYIAGIQN  | 5159 |
| AAx76519.1       | DYVD---YTFVN----EYEFELCK---HFSMMILSDDGVVVCYNSDYASKGYIANISV | 5204 |
| AFE48810.1       | DTVD---PTFVT----EYEFELNK---HFSMMILSDDGVVVCYNSDYASKGYIANISA | 5206 |
| AAF19384.1       | DHVD---PAFVN----EYEFELNK---HFSMMILSDDGVVVCYNSEFASKGYIANISA | 788  |
| YP_009019180.1   | SVVD---PLVID----EYAYLRK---HFSMMILSDDGVVVCYNKEYADLGVVADISA  | 4777 |
| ACT10947.1       | SSVD---DDFVV----EYFYLNR---HFSMMILSDDGVVVCYNKYADLGVVADIGA   | 4788 |
| YP_001718610.1   | SAVD---PGFVD----TFYGLRK---HFSMMILSDDGVVVCYNKEYASLGVVADINA  | 4990 |
| YP_001718603.1   | STVD---PAFVD----TFYGLRK---HFSMMILSDDGVVVCYNKEYASLGVVADIGA  | 5027 |
| YP_008439200.1   | STVD---DNFVN----DYGFELRK---HFSMMILSDDGVVCHNSEYAQLGVVADLNA  | 4919 |
| AFU92112.1       | SSVD---EQFID----KYCYLRK---HFSMMILSDDGVVVCYNKYADLGVVADISA   | 4874 |
| YP_001351683.1   | SSVD---QSFVE----EYFYLNR---HFSMMILSDDGVVVCYNSEYAALGVVADLNA  | 4887 |
| AGK89913.1       | TTVD---DQFVV----EYFYLNR---HFSMMILSDDGVVVCYNNDYASLGVVADLNA  | 4876 |
| YP_003766.2      | TSVE---ESFID----DYFYLNR---HFSMMILSDDGVVVCYNKYAELGYIADISA   | 4819 |
| AFI49429.1       | SNVD---ESFVD----DFYGLQK---HFSMMILSDDGVVVCYNKIYAEALGYIADISA | 4848 |
| YP_001552234.1   | SAVD---DNVVT----DFYNYLKK---HFSMMILSDDGVVVCYNKEYAALGVVGDISA | 4818 |
| AGK85497.1       | VNFD---SAFVE----KFYSLCK---NFSMLILSDDGVVVCYNNTLAKQLVADISG   | 4715 |
| AHB63480.1       | DKPD---MDFVY----TFYAYLNR---HFSMLILSDDGVVVCYNSDYAEGMVASIAS  | 4722 |
| ADM33581.1       | NTVD---YELVL----DYNYLNR---HFSMMILSDDGVVVCYNSDYAQKGVVADIQG  | 4989 |
| AAP50483.1       | RDVD---HEFVD----EFYAYLRK---HFSMMILSDDAVVCYNSNYAAQLVASIKN   | 5150 |
| SARS-CoV-2_nsp12 | RDVD---TDFVN----EFYAYLRK---HFSMMILSDDAVVCFNSTYASQGLVASIKN  | 781  |
| YP_009724389.1   | RDVD---TDFVN----EFYAYLRK---HFSMMILSDDAVVCFNSTYASQGLVASIKN  | 5173 |

\*\*\*

|                  |                                                           |      |
|------------------|-----------------------------------------------------------|------|
| YP_001661452.1   | -----LDQYLSSYRTLGGYEITNEKKIFVR---DEPYEFTFRYFFKE-----      | 4941 |
| YP_009666324.1   | -----LDQYLSSYRTLGGYEITNEKKIFVR---DEPYEFTSRYFFKE-----      | 4953 |
| YP_008798230.1   | FSNKLTILHTKVDQTKSWSAS-----GHIIEFCSAHIKKT-----             | 5144 |
| YP_337905.2      | FSNKLTILHTKVDLTKSWATT-----GHIIEFCSAHIKKT-----             | 5172 |
| ABI97394.1       | FSMKLNVLGCVVDPKASWSAD-----GEIHEFCSSHIKCI-----             | 5285 |
| YP_009505581.1   | FSIKLQSVLGCADVTKSWTEA-----GKIHEFCSSHIBLV-----             | 5590 |
| YP_007697636.1   | -----YDDFMAESHMISKYAIATNKHKYHLDPVQRKAREFLSQDTFPH-----     | 3422 |
| YP_007697642.1   | -----YDDFMAVSHMISYMIQAQNKHKYHIDAIERYAREFLSQDTIKF-----     | 3449 |
| YP_009026378.1   | -----YDDFMSISHLISHYMIQAQNKHKYHIDAIERYAREFLSQDTIKF-----    | 3427 |
| AEH26445.1       | -----YDDFMSVSHLISHYMIQAQNKHKYHIDAIQRYAREFLSQDTIKF-----    | 3447 |
| YP_007697629.1   | -----YTDYMSISHLISHYMIQAQNKHKYHIDAISSYAREFLSQGPHKF-----    | 3451 |
| EAV_nsp9         | -----TTPNQHYAASFRDWRVPH-----L-QALLGF-KVDPKKTVENTSSPSFLGCR | 607  |
| ABI64079.1       | -----TTPNQHYAASFRDWRVPH-----L-QALLGF-KVDPKKTVENTSSPSFLGCR | 557  |
| AEC48047.1       | -----LNEPED-FPNFVYWSHD-----L-DLALGF-KTCRSKTVITSNPGFLGCR   | 554  |
| YP_009109556.3   | -----LNESDD-LPNFERWVPH-----L-ELALGF-KVDPKKTVITSNPGFLGCE   | 2657 |
| AZT89154.1       | -----LNESDD-LPNFERWVPH-----L-ELALGF-KVDPKKTVITSNPGFLGCE   | 2657 |
| AGA19090.1       | -----MQESPG-LPNFKYWNHA-----L-DLALGF-KTDPKKTIVTSKPSFLGCT   | 555  |
| AAA74104.1       | -----YDESSE-LPNYHFFVDH-----L-DLMLGF-KTDRSKTVITSDPQFGCR    | 551  |
| AAA85664.1       | -----YNESDE-LPNYHFFVDH-----L-DLMLGF-KTDRSKTVITSEKPLPGCR   | 550  |
| AEJ54658.1       | -----YAEKPT-FPNYHWWVEH-----L-DLMLGF-KTDPKKTVITDKPSFLGCK   | 557  |
| QPK93580.1       | -----YAESPS-MPNYHWWVEH-----L-NLMLGF-QTDPKKTAITDPSFLGCR    | 2924 |
| ANT45956.1       | -----YAESPS-MPNYHWWVEH-----L-NLMLGF-QTDPKKTAITDPSFLGCR    | 2924 |
| ALL55209.1       | -----YAESPT-MPNYHWWVEH-----L-NLMLGF-QTDPKKTITDPSFLGCR     | 2955 |
| APU51031.1       | -----YAESPT-MPNYHWWVEH-----L-NLMLGF-QTDPKKTAITDPSFLGCR    | 2874 |
| AFP43966.1       | -----YAESPT-MPNYHWWVEH-----L-NLMLGF-QTDPKKTAITDPSFLGCR    | 3055 |
| YP_005352880.1   | FRDVLFYQNNVFMDSKWCWTE-----DMTKGPHFCFSQHTVLT-----          | 4340 |
| YP_002308505.1   | FRDVLFYQNNVFMDSKWCWTE-----DMTVGPHFCFSQHTVLA-----          | 4478 |
| YP_005352845.1   | FRDILFYQNNVFMDSKWCWTE-----DMTVGPHFCFSQHTVLA-----          | 4447 |
| YP_002308478.1   | FRDILFYQNNVFMDSKWCWTE-----DMTVGPHFCFSQHTVLA-----          | 4394 |
| ABG47051.1       | FKETLYYQNNVFMSEAKCWVET-----DLEKGPHEFCFSQHTLFI-----        | 5249 |
| YP_009513008.1   | FKETLYYQNNVFLSEAKCWVET-----DIEKGPHEFCFSQHTLLI-----        | 5262 |
| ABN10874.1       | FKETLYYQNNVFMSEAKCWVET-----DLKKGPHFCFSQHTLFI-----         | 5289 |
| YP_009047202.1   | FKETLYYQNNVFMSEAKCWVET-----DLKKGPHFCFSQHTLFI-----         | 5198 |
| AAK76519.1       | FQOVLYYQNNVFMSEKWCWVEN-----DITNGPHEFCFSQHTMLV-----        | 5243 |
| AFE48810.1       | FQOVLYYQNNVFMSEKWCWVEN-----DINHGPHEFCFSQHTMLV-----        | 5245 |
| AAF19384.1       | FQOVLYYQNNVFMSEAKCWVET-----DIEKGPHEFCFSQHTMLV-----        | 827  |
| YP_009019180.1   | FKSVLYYQNNVFMSEAKCWVET-----DLSVGPHEFCFSQHTMQI-----        | 4816 |
| ACT10947.1       | FKATLYYQNNVFMSTAKCWVET-----DLNKGPHFCFSQHTLQI-----         | 4827 |
| YP_001718610.1   | FKATLYYQNNVFMSTAKCWVEE-----DLTKGPHFCFSQHTMQI-----         | 5029 |
| YP_001718603.1   | FKATLYYQNNVFMSTAKCWVEE-----DLSKGPHEFCFSQHTLQI-----        | 5066 |
| YP_008439200.1   | FKSVLYYQNNVFMSEKWCWVET-----DVNKGPHFCFSQHTMQI-----         | 4958 |
| AFU92112.1       | FKATLYYQNNVFMSTAKCWVET-----DITKGPHFCFSQHTMQI-----         | 4913 |
| YP_001351683.1   | FKAVLYYQNNVFMSEKWCWVET-----DINKGPHEFCFSQHTMQI-----        | 4926 |
| AGK89913.1       | FKAVLYYQNNVFMSEKWCWVET-----DINKGPHEFCFSQHTMQI-----        | 4915 |
| YP_003766.2      | FKATLYYQNNVFMSTAKCWVEE-----DLTKGPHFCFSQHTMQI-----         | 4858 |
| AFI49429.1       | FKATLYYQNVFMSTAKCWTEE-----DLSVGPHEFCFSQHTMQI-----         | 4887 |
| YP_001552234.1   | FKATLYYQNNVFMSTAKCWVEE-----DLSVGPHEFCFSQHTMQI-----        | 4857 |
| AGK85497.1       | FREILLYQNNVFMDSKWCWVEP-----DLEKGPHEFCFSQHTMLV-----        | 4754 |
| AHB63480.1       | FREVLFYQNNVFMDSKWCWTEE-----DVKIGPHEFCFSQHSMLV-----        | 4761 |
| ADM33581.1       | FKELLYYQNNVFMSEAKCWVET-----DITKGPHFCFSQHTMLV-----         | 5028 |
| AAP50483.1       | FKAVLYYQNNVFMSEAKCWTE-----DLTKGPHFCFSQHTMLV-----          | 5189 |
| SARS-CoV-2_nsp12 | FKSVLYYQNNVFMSEAKCWTE-----DLTKGPHFCFSQHTMLV-----          | 820  |
| YP_009724389.1   | FKSVLYYQNNVFMSEAKCWTE-----DLTKGPHFCFSQHTMLV-----          | 5212 |

**Supplementary Figure 19. Multiple sequence alignment of EAV nsp9.** EAV nsp9 contains the RNA polymerase domain at approximately residue 360 to 549 that is conserved throughout nidoviruses. The arrow indicates the location of EAV nsp9 residue 380. “\*” indicates complete conservation, “:” indicates strong conservation, and “.” indicates weaker conservation per the Clustal Omega algorithm. The EAV nsp9, EAV polyprotein (ABI64079.1), SARS-CoV-2 polyprotein (YP\_009724389.1), and SARS-CoV-2 nsp12 sequences are included as separate entries in the alignment.

a

| Score         | Expect                                                       | Method                       | Identities  | Positives   | Gaps        |
|---------------|--------------------------------------------------------------|------------------------------|-------------|-------------|-------------|
| 37.4 bits(85) | 7e-04                                                        | Compositional matrix adjust. | 43/213(20%) | 85/213(39%) | 49/213(23%) |
| Query 360     | DDMVSQSMKSNLQTATMATCKRQYCSKYKIRSILGTNNYIGLGLRACLSGVTAAFQK--- |                              |             |             | 416         |
| Sbjct 525     | D + + + ++ + T T K +K + R++ G + C + F +                      |                              |             |             | 576         |
| Query 417     | ---AGKDGSPiYLGKSKF-----DPIAPADKYCLETDLESCDRSTPALVRWFA        |                              |             |             | 461         |
| Sbjct 577     | A G+ + +G SKF + P + + D CDR+ P ++R A                         |                              |             |             | 634         |
| Query 462     | TNLI-----FELAGQPELVHSYVLCCHDLVVAGSVAFTKRGLSSGDPIIT           |                              |             |             | 507         |
| Sbjct 635     | + ++ + LA + V S ++V+ G + K GG SSGD T                         |                              |             |             | 687         |
| Query 508     | SISNTIYSLVLYTQHMLLCGLEGFPEIAEKYL                             |                              | 540         |             |             |
| Sbjct 688     | + +N+++++ + L +IA+KY+                                        |                              | 720         |             |             |
|               | AYANSVFNICQAVTANVNALLSTDGINKIADKYV                           |                              |             |             |             |

b

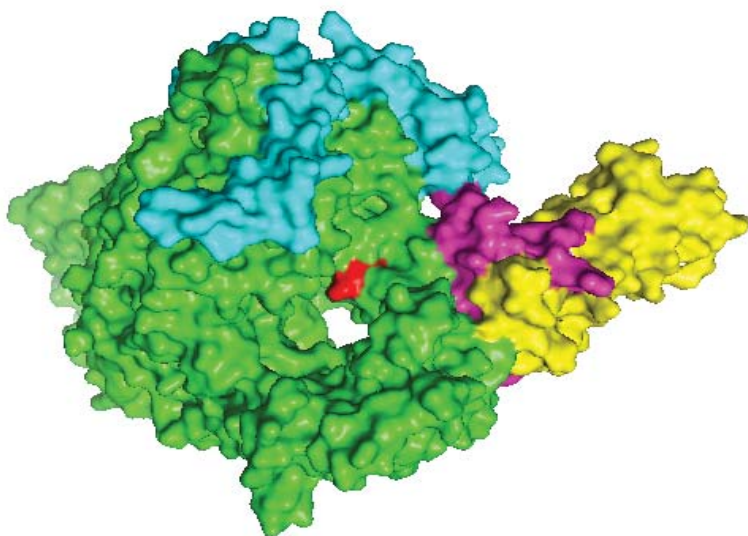

**Supplementary Figure 20. Location of EAV nsp9 K380 residue in the SARS-CoV-2 nsp12/nsp8/nsp7 structure.** a, Sequence alignment of EAV nsp9 (query) and SARS-CoV-2 nsp12 (subject) is shown as performed using the BLAST algorithm. b, \*The homologous residue of EAV nsp9 K380 is K545 in SARS-CoV-2 nsp12. The cryo-EM structure of the SARS-CoV-2 nsp7 (magenta), nsp8 (two molecules in cyan and yellow), and nsp12 (green) heterocomplex is shown (PDB 7btf) as a surface representation. Residue K545 at the NTP binding site and at the entrance of the RNA tunnel is shown in red.



|                    |                                                             |      |
|--------------------|-------------------------------------------------------------|------|
| gi   72   EAV_nsp7 | -----SLTATLA-ALTDFFFQFL                                     | 17   |
| ABI64071.1         | DVFSASGRFDRTFMMKYFLEGGVKESVTASVTRAYGKPIQESLTATLA-ALTDFFFQFL | 1469 |
| AEC48046.1         | LLLSGNGSFDPAFFVRYVQEG-VREGVAS-----TIATESLSGALAVNLSAELEFL    | 1822 |
| AGA19089.1         | SIISGTGSFDPAFLARYVHEG-IRQGVST-----GYATESLSACLATSLSKDELAFLV  | 1812 |
| YP_009109556.3     | SVIGCHGSFDPTFLSRYVHEG-IRQGVSS-----GFGTESLSTALACALSEDELNFL   | 1861 |
| AZT89154.1         | SVIGCHGSFDPTFLSRYVHEG-IRQGVSS-----GFGTESLSTALACALSEDELNFL   | 1861 |
| AAA74103.1         | DMLVGNCFDAAFFLKYFAEENLRDGVSDSC-----NMTPEGLTAALAITLSDDLEFL   | 1932 |
| AAA85663.1         | DVLVGNCSFDAAFFLKYFAEENLRDGVSDSC-----NMTPEGLTAALAITLSDDLEFL  | 1912 |
| AEJ54657.1         | NMLVGDGSFSSAFFLRYFAEENLRKGVSQSC-----GMNHESLTAALACKLSQADLDFL | 2072 |
| QPK93580.1         | FVLVGDGAFSAAFFLRYFAEGKLRGVSQSC-----GMNHESLTGALAMKLNDELDLDFL | 2086 |
| ANT45956.1         | FVLVGDGAFSAAFFLRYFAEGKLRGVSQSC-----GMNHESLTGALAMKLNDELDLDFL | 2086 |
| ALL55209.1         | YILVGDGVFSRAFFLRYFAEGKLRGVSQSC-----GINHESLTGALAMKLNDELDLDFL | 2117 |
| APU51031.1         | HILVGDGVFSRAFFLRYFAEGKLRGVSQSC-----GMNHESLTGALAMRLNDELDLDFL | 2036 |
| AFP43966.1         | NVLVGDGAFSAAFFLRYFAEGKLRGVSQSC-----GMNHESLTGALAMRLNDELDLDFL | 2217 |
|                    | . * : * * * : : * :                                         |      |

|                    |                                                               |      |
|--------------------|---------------------------------------------------------------|------|
| gi   72   EAV_nsp7 | SDVLDCAVRSAMNLRALTSFQVAQYRNILNASLQVDRDAARSRRMLAKLADFAVE--Q    | 75   |
| ABI64071.1         | SDVLDCAVRSAMNLRALTSFQVAQYRNILNASLQVDRDAARSRRMLAKLADFAVE--Q    | 1527 |
| AEC48046.1         | NAIVPCKAFASASNLKAMGDFQQSQAQKQLRRALAGVQATANTTAALATLDQFLSTKVR   | 1882 |
| AGA19089.1         | EQLVDCKAVVAANTQRALDDYILSTNAKRLRSHLTSVHATAAAQRALACLEDLFLVGTSK  | 1872 |
| YP_009109556.3     | AQAVDHKAIVSAIHVHKTLQDYIILSKNAKILRASLASVHANHNASKALASLDKFLQGTST | 1921 |
| AZT89154.1         | AQAVDHKAIVSAIHVHKTLQDYIILSKNAKILRASLASVHANHNASKALASLDKFLQGTST | 1921 |
| AAA74103.1         | QRHSEFKCFVSASNMNRNGAKEFIESAYARALRAQLAATDKIKASKSILAKLESFAGGVVT | 1992 |
| AAA85663.1         | QRHSEFKCFVSASNMNRNGAKEFIESAYARALRAQLAATDKIKASKSILAKLESFAGGVVT | 1972 |
| AEJ54657.1         | SSLTNFKCFVSASNMKNAAGQYIEAAYAKALRQELASLVQIDKMKGVLSKLEAFATATP   | 2132 |
| QPK93580.1         | TKLTDKCFVSASNMNRNAAGQFIEAAYAKALRTELAQLVQVQDKVGVGLAKLEAFADTVAP | 2146 |
| ANT45956.1         | TKWTDKCFVSASNMNRNAAGQFIEAAYAKALRVELAQLVQVQDKVGVMAKLEAFADTVAP  | 2146 |
| ALL55209.1         | TKLTDKCFVSASNMNRNAAGQFIEAAYAKALRVELAQLVQVQDKVGVGLAKLEAFADTATP | 2177 |
| APU51031.1         | MKWTDKCFVSASNMNRNAAGQFIEAAYAKALRVELAQLVQVQDKVGVGLAKLEAFADTVAP | 2096 |
| AFP43966.1         | TKWTDKCFVSASNMNRNAAGQFIEAAYAKALRIELAQLVQVQDKVGVGLAKLEAFADTVAP | 2277 |
|                    | : . . * * : : : . * . * : : * *                               |      |

|                    |                                                                  |      |
|--------------------|------------------------------------------------------------------|------|
| gi   72   EAV_nsp7 | EVTAGDRVVVIDGLDR----MAHFKDDLVLVPLTTKVVGGSRCTICDVKKEEANDTPVK      | 130  |
| ABI64071.1         | EVTAGDRVVVIDGLDR----MAHFKDDLVLVPLTTKVVGGSRCTICDVKKEEANDTPVK      | 1582 |
| AEC48046.1         | GPRTGDTVVYLKGP-RGEIFDGYVGETQVILKPVRTQSVAGVTCTICEVTVPTEAMSK-H     | 1940 |
| AGA19089.1         | PLKPGDPVILLGAA-PGTISPFCGDKKEYVVRPIRSQTVAGTLCCTLCQVEVVVEAGLL-G    | 1930 |
| YP_009109556.3     | QLKPGDPVILLGST-SAELVSVFSGDSEYIAEPIRSHPVAGTICTLCVVQAKCEGLV-T      | 1979 |
| AZT89154.1         | QLKPGDPVILLGST-SAELVSVFSGDSEYIAEPIRSHPVAGTICTLCVVQAKCEGLV-T      | 1979 |
| AAA74103.1         | QVEPGDVVVVLGKKVIGDLVEVINDAKHVIRVIEIETRTMAGTQFSVGTICGDLENACE-D    | 2051 |
| AAA85663.1         | KVEPGDVVVVLGKKVIGDLVEITINDVKHVIRVIEIETRVMAGTQFSVGTICGDLENACE-D   | 2031 |
| AEJ54657.1         | SLDTGDVIVLLGQHPHGSILDINVGTERKTVSVQETRSLLGKTFKFSVCTVVSNTPTPVDAL-T | 2191 |
| QPK93580.1         | QLLPGDIVVVLGHTPVGSIFDLKIGNTRHTLQSIETRLLAGSKMTVARVVDPTPTPPP-A     | 2205 |
| ANT45956.1         | QLSPGDIVVALGHTPVGSIFDLKVGNTKHTLQSIETRVLAGSKMTVARVVDPTPTPPP-A     | 2205 |
| ALL55209.1         | QLSPGDIVVALGHTPVGSIFDLKVGSTKHTLQAIETRVLAGSRMTVARVVDPTPTPPP-V     | 2236 |
| APU51031.1         | QLSPGDIVVALGHTPVGSIFDLKVGSTKHTLQAIETRVLAGSKMTVARVIHPTPTPPP-A     | 2155 |
| AFP43966.1         | QLSPGDIVVALGHTPVGSIFDLKVGSTKHTLQAIETRVLAGSKMTVARVVDPTPTPPP-E     | 2336 |
|                    | ** : : : . : : : * : : : : ↑                                     |      |



| Labeling compound   | Mass addition | Mass Difference (reference = GTP) |        |        |
|---------------------|---------------|-----------------------------------|--------|--------|
|                     |               | z = 1                             | z = 2  | z = 3  |
| GTP                 | 345.0474      | -                                 | -      | -      |
| <sup>15</sup> N-GTP | 350.0326      | 4.9852                            | 2.4926 | 1.6617 |
| <sup>13</sup> C-GTP | 355.0810      | 10.0336                           | 5.0168 | 3.3445 |

**Supplementary Table 1. Mass additions and differences for GMP, <sup>15</sup>N-GMP and <sup>13</sup>C-GMP-modification to peptides.** The mass added to any peptide modified by GMP, <sup>15</sup>N-GMP and <sup>13</sup>C-GMP is shown as well as the mass differences between the GMP-labeled and the heavy-labeled GMP peptides for the specified charge states (z). Related to Figure 2c.

|    | <b>c<sup>+</sup></b> | <b>Sequence</b>    | <b>y<sup>+</sup></b> | <b>z<sup>+</sup></b> |    |
|----|----------------------|--------------------|----------------------|----------------------|----|
| 1  | 75.05529             | G                  |                      |                      | 14 |
| 2  | 507.13475            | S-Phosphoguanosine | 1798.78635*          | 1783.77545*          | 13 |
| 3  | 635.22972            | K                  | 1366.70688*          | 1351.69598*          | 12 |
| 4  | 766.27020*           | M                  | 1238.61192*          | 1223.60102           | 11 |
| 5  | 853.30223*           | S                  | 1107.57144*          | 1092.56054*          | 10 |
| 6  | 968.32917*           | D                  | 1020.53941*          | 1005.52851*          | 9  |
| 7  | 1067.39759*          | V                  | 905.51247            | 890.50157*           | 8  |
| 8  | 1195.49255*          | K                  | 806.44405*           | 791.43315*           | 7  |
| 9  | 1355.52320*          | C-Carbamidomethyl  | 678.34909            | 663.33819            | 6  |
| 10 | 1456.57088*          | T                  | 518.31844            | 503.30754            | 5  |
| 11 | 1543.60290*          | S                  | 417.27076            | 402.25986            | 4  |
| 12 | 1642.67132*          | V                  | 330.23873            | 315.22783            | 3  |
| 13 | 1741.73973*          | V                  | 231.17032*           | 216.15942            | 2  |
| 14 |                      | L                  | 132.10191            | 117.09101            | 1  |

**Supplementary Table 2. Ion series for GMP-modified SARS-CoV-2 nsp 7 peptide 1-14.** Calculated masses for c-, y-, and z-series ions that could be generated following EThcD fragmentation of nsp7 peptide 1-14 that is modified at serine-2. The ions, that were experimentally observed (+/- 0.04 Da) in the example spectrum from Figure 2d, are shown in red or blue coloring and are also denoted with an asterisk.

|    | <b>b<sup>+</sup></b> | <b>Sequence</b>    | <b>y<sup>+</sup></b> | <b>y<sup>2+</sup></b> |    |
|----|----------------------|--------------------|----------------------|-----------------------|----|
| 1  | 58.02874             | G                  |                      |                       | 17 |
| 2  | 171.11280*           | L                  | 2309.04588           | 1155.02658            | 16 |
| 3  | 268.16557            | P                  | 2195.96182           | 1098.48455            | 15 |
| 4  | 741.30797            | K-Phosphoguanosine | 2098.90906           | 1049.95817            | 14 |
| 5  | 798.32943            | G                  | 1625.76666*          | 813.38697*            | 13 |
| 6  | 869.36654            | A                  | 1568.74519*          | 784.87624*            | 12 |
| 7  | 997.42512            | Q                  | 1497.70808*          | 749.35768*            | 11 |
| 8  | 1110.50918*          | L                  | 1369.64950*          | 685.32839*            | 10 |
| 9  | 1239.55178*          | E                  | 1256.56544*          | 628.78636*            | 9  |
| 10 | 1425.63109           | W                  | 1127.52285*          | 564.26506*            | 8  |
| 11 | 1540.65803           | D                  | 941.44353*           | 471.22541             | 7  |
| 12 | 1696.75914           | R                  | 826.41659*           | 413.71193*            | 6  |
| 13 | 1833.81806           | H                  | 670.31548*           | 335.66138             | 5  |
| 14 | 1961.87663           | Q                  | 533.25657*           | 267.13192             | 4  |
| 15 | 2090.91923           | E                  | 405.19799*           | 203.10263             | 3  |
| 16 | 2219.96182           | E                  | 276.15540*           | 138.58134             | 2  |
| 17 |                      | K                  | 147.11280            | 74.06004              | 1  |

**Supplementary Table 3. Ion series for GMP-modified EAV nsp7 peptide 140-156.** Calculated masses for b- and y-series ions that could be generated following HCD fragmentation of nsp7 peptide 140-156 that is modified at lysine-143. The ions, that were experimentally observed (+/- 0.04 Da) in the example spectrum from Figure 3a, are shown in red or blue coloring and are also denoted with an asterisk.

|    | <b>b<sup>+</sup></b> | <b>Sequence</b>          | <b>y<sup>+</sup></b> | <b>y<sup>2+</sup></b> |    |
|----|----------------------|--------------------------|----------------------|-----------------------|----|
| 1  | 58.02874             | G                        |                      |                       | 17 |
| 2  | 171.11280*           | L                        | 2319.07945           | 1160.04336            | 16 |
| 3  | 268.16557            | P                        | 2205.99538           | 1103.50133            | 15 |
| 4  | 751.34153            | K-Phosphoguanosine (13C) | 2108.94262           | 1054.97495            | 14 |
| 5  | 808.36299            | G                        | 1625.76666*          | 813.38697*            | 13 |
| 6  | 879.40011            | A                        | 1568.74519*          | 784.87624*            | 12 |
| 7  | 1007.45869           | Q                        | 1497.70808           | 749.35768*            | 11 |
| 8  | 1120.54275           | L                        | 1369.64950*          | 685.32839*            | 10 |
| 9  | 1249.58534           | E                        | 1256.56544*          | 628.78636*            | 9  |
| 10 | 1435.66466           | W                        | 1127.52285*          | 564.26506*            | 8  |
| 11 | 1550.69160           | D                        | 941.44353*           | 471.22541             | 7  |
| 12 | 1706.79271           | R                        | 826.41659*           | 413.71193*            | 6  |
| 13 | 1843.85162           | H                        | 670.31548*           | 335.66138             | 5  |
| 14 | 1971.91020           | Q                        | 533.25657*           | 267.13192             | 4  |
| 15 | 2100.95279           | E                        | 405.19799*           | 203.10263             | 3  |
| 16 | 2229.99538           | E                        | 276.15540*           | 138.58134             | 2  |
| 17 |                      | K                        | 147.11280            | 74.06004              | 1  |

**Supplementary Table 4. Ion series for <sup>13</sup>C-GMP-modified EAV nsp7 peptide 140-156.** Calculated masses for b- and y-series ions that could be generated following HCD fragmentation of nsp7 peptide 140-156 that is modified at lysine-143. The ions, that were experimentally observed (+/- 0.04 Da) in the example spectrum from Figure 3b, are shown in red or blue coloring and are also denoted with an asterisk.

|    | <b>b<sup>+</sup></b> | <b>b<sup>2+</sup></b> | <b>Sequence</b>          | <b>y<sup>+</sup></b> |    |
|----|----------------------|-----------------------|--------------------------|----------------------|----|
| 1  | 157.10839*           | 79.05783              | R                        |                      | 17 |
| 2  | 271.15131*           | 136.07930             | N                        | 2135.83643           | 16 |
| 3  | 342.18843            | 171.59785             | A                        | 2021.79350           | 15 |
| 4  | 399.20989*           | 200.10858             | G                        | 1950.75639           | 14 |
| 5  | 514.23684*           | 257.62206             | D                        | 1893.73493           | 13 |
| 6  | 629.26378*           | 315.13553             | D                        | 1778.70798           | 12 |
| 7  | 744.29072*           | 372.64900             | D                        | 1663.68104           | 11 |
| 8  | 891.35914*           | 446.18321             | F                        | 1548.65410           | 10 |
| 9  | 962.39625            | 481.70176*            | A                        | 1401.58568           | 9  |
| 10 | 1061.46466*          | 531.23597             | V                        | 1330.54857           | 8  |
| 11 | 1148.49669*          | 574.75198             | S                        | 1231.48016           | 7  |
| 12 | 1262.53962*          | 631.77345             | N                        | 1144.44813           | 6  |
| 13 | 1377.56656*          | 689.28692             | D                        | 1030.40520           | 5  |
| 14 | 1540.62989*          | 770.81858             | Y                        | 915.37826            | 4  |
| 15 | 1639.69830*          | 820.35279             | V                        | 752.31493            | 3  |
| 16 | 1767.79327*          | 884.40027             | K                        | 653.24652            | 2  |
| 17 |                      |                       | R-Phosphoguanosine (15N) | 525.15155            | 1  |

**Supplementary Table 5. Ion series for <sup>15</sup>N-GMP-modified EAV nsp7 peptide 157-173.** Calculated masses for b- and y-series ions that could be generated following HCD fragmentation of nsp7 peptide 157-173 that is modified at arginine-173. (Note that Sequest matched the GMP modification to arginine-173 instead of lysine-172 for this HCD spectrum) The ions, that were experimentally observed (+/- 0.04 Da) in the example spectrum from Figure 3c, are shown in red or blue coloring and are also denoted with an asterisk.

|    | c <sup>+</sup> | c+H <sup>+</sup> | Sequence          | y <sup>+</sup> | z <sup>+</sup> | z+H <sup>+</sup> | z-H <sup>+</sup> |    |
|----|----------------|------------------|-------------------|----------------|----------------|------------------|------------------|----|
| 1  | 75.05529       | 76.06311         | G                 |                |                |                  |                  | 14 |
| 2  | 468.11262      | 469.12044        | S-PhosphoUridine  | 1759.76421*    | 1744.75332     | 1745.76114*      | 1743.74549       | 13 |
| 3  | 596.20758*     | 597.21541*       | K                 | 1366.70688     | 1351.69598     | 1352.70381*      | 1350.68816       | 12 |
| 4  | 727.24807*     | 728.25589*       | M                 | 1238.61192*    | 1223.60102*    | 1224.60885*      | 1222.59320*      | 11 |
| 5  | 814.28010*     | 815.28792*       | S                 | 1107.57144     | 1092.56054*    | 1093.56836       | 1091.55271*      | 10 |
| 6  | 929.30704*     | 930.31486*       | D                 | 1020.53941*    | 1005.52851*    | 1006.53633*      | 1004.52068*      | 9  |
| 7  | 1028.37545*    | 1029.38328*      | V                 | 905.51247      | 890.50157*     | 891.50939*       | 889.49374*       | 8  |
| 8  | 1156.47042*    | 1157.47824       | K                 | 806.44405*     | 791.43315*     | 792.44098        | 790.42533*       | 7  |
| 9  | 1316.50106*    | 1317.50889*      | C-Carbamidomethyl | 678.34909*     | 663.33819      | 664.34601        | 662.33036        | 6  |
| 10 | 1417.54874*    | 1418.55657*      | T                 | 518.31844*     | 503.30754*     | 504.31537        | 502.29972*       | 5  |
| 11 | 1504.58077*    | 1505.58860*      | S                 | 417.27076*     | 402.25986*     | 403.26769        | 401.25204*       | 4  |
| 12 | 1603.64918*    | 1604.65701*      | V                 | 330.23873      | 315.22783      | 316.23566        | 314.22001        | 3  |
| 13 | 1702.71760*    | 1703.72542*      | V                 | 231.17032*     | 216.15942      | 217.16725        | 215.15160        | 2  |
| 14 |                |                  | L                 | 132.10191      | 117.09101      | 118.09883        | 116.08318        | 1  |

**Supplementary Table 6. Ion series for UMP-modified SARS-CoV-2 nsp 7 peptide 1-14.** Calculated masses for c-, y-, and z-series ions that could be generated following ETcD fragmentation of nsp7 peptide 1-14 that is modified at serine-2. The ions, that were experimentally observed (+/- 0.04 Da) in the example spectrum from Figure 5e, are shown in red or blue coloring and are also denoted with an asterisk.
