# Supplementary material
Source: PubMed Central journal article supplement (PMC9814871)
Supplement: 42004_2021_476_MOESM2_ESM.pdf [file 42004_2021_476_MOESM2_ESM.pdf]

## Description of Additional Supplementary Files

File Name: Supplementary Data 1

Description: Data analysis of LC-MS peaks for a single SARS-CoV-2 chymotrypsin-digested sample that contained peptides labeled with GMP, <sup>15</sup>N-GMP and <sup>13</sup>C-GMP. "Search set up" tab shows formulas and criteria to search each LC-MS peak against all others ("index to search" tab). Two additional tabs show search results and filtered results.

File Name: Supplementary Data 2

Description: Data analysis of LC-MS peaks for a single SARS-CoV-2 GluC-digested sample that contained peptides labeled with GMP, <sup>15</sup>N-GMP and <sup>13</sup>C-GMP. "Search set up" tab shows formulas and criteria to search each LC-MS peak against all others ("index to search" tab). Two additional tabs show search results and filtered results.

File Name: Supplementary Data 3

Description: Data analysis of LC-MS peaks for EAV trypsin-digested samples that were not labeled with GMP or were labeled with either GMP, <sup>15</sup>N-GMP or <sup>13</sup>C-GMP. Peaks unique to two labeled, replicate injections (GMP-, <sup>15</sup>N-GMP or <sup>13</sup>C-GMP-labeled) were exported and searched against all others ("index to search" tab). Three tabs total.

File Name: Supplementary Data 4

Description: Summary of all MS/MS peptide spectrum matches containing a GMP, <sup>15</sup>N-GMP, or <sup>13</sup>C-GMP adduct. Top scoring hits for each peptide mass (m/z) and for each fragmentation method (HCD or EThcD) are shown along with peptide sequence, Xcorrelation score, precursor mass error, raw data file name, scan number, and other relevant information.
